# Supplementary material for: AI-driven Discovery of Morphomolecular Signatures in Toxicology
Source: PubMed Central journal article supplement — bioRxiv. 2024 Jul 23:2024.07.19.604355. Preprint. [Version 1] doi: 10.1101/2024.07.19.604355 (PMC11291055; doi:10.1101/2024.07.19.604355), 2024-07-23
Supplement: NIHPP2024.07.19.604355V1-supplement-1.pdf [file NIHPP2024.07.19.604355V1-supplement-1.pdf]

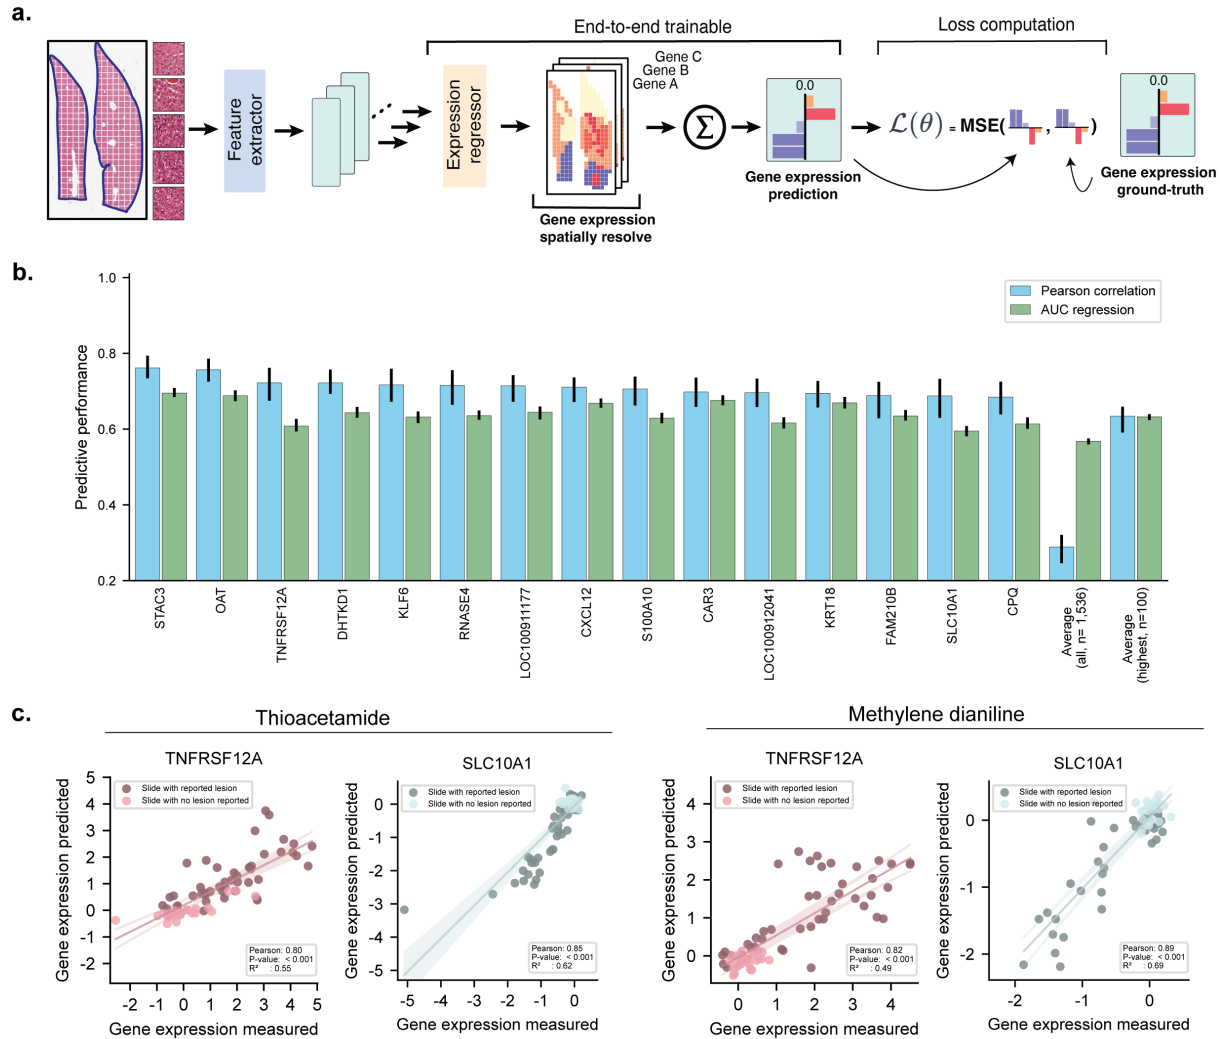

**Figure S1: GESE model architecture and performance.** **a.** Overview of the gene expression regressor (GESE) architecture, which can predict expression changes (log<sub>2</sub> fold change) from an input tissue section (a whole-slide image). Patch attribution enables deriving a pseudo-spatially-resolve expression map, where each patch becomes associated with a pseudo-expression profile for all predicted genes (n=1,536). **b.** Slide-level gene expression prediction performance evaluated using Pearson correlation and macro-AUC regression on TG-GATEs test set (N=2,002 slides). We report predictive performance for the top 10 predicted genes, the average predictive performance across all genes (n=1,536), and the top 100 best-predicted. Error bars represent 95% confidence intervals using non-parametric bootstrapping (100 iterations). **c.** Expression prediction of *TNFRSF12A* and *SLC10A1* genes on compounds thioacetamide and methylene dianiline. Each dot represents a sample. Samples without lesions are clustered around the origin (small log<sub>2</sub> fold change), while samples with lesions are either downregulated (*SLC10A1*) or upregulated (*TNFRSF12A*). P-value derived from testing the two-sided null hypothesis of non-correlation.

a. **Compound:** Bromobenzene, **Dose:** 100.0 mg/kg (Middle), **Time of sacrifice:** 4 days, **Administration:** Repeated dose, **Slide #:** 30476

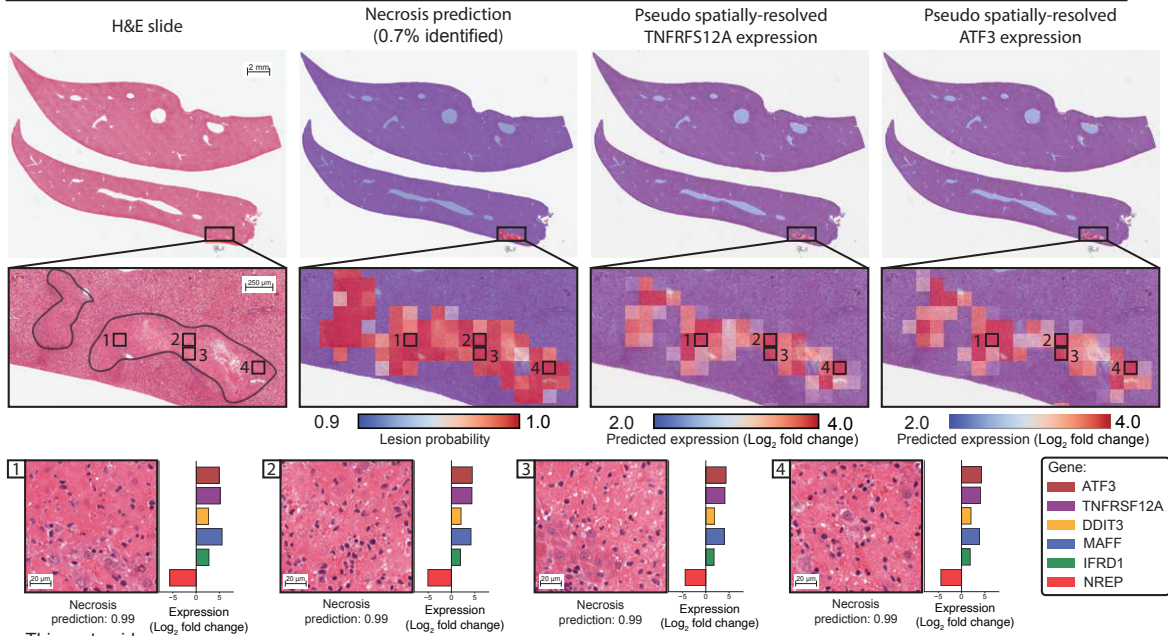

b. **Thioacetamide**

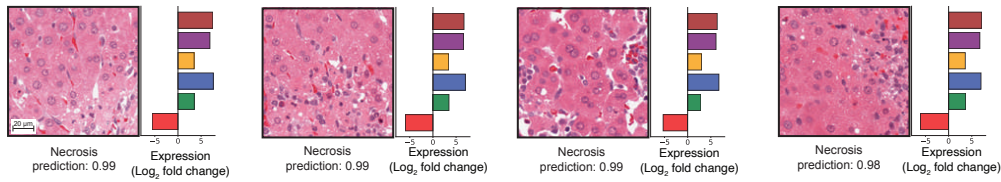

**Ethionamide**

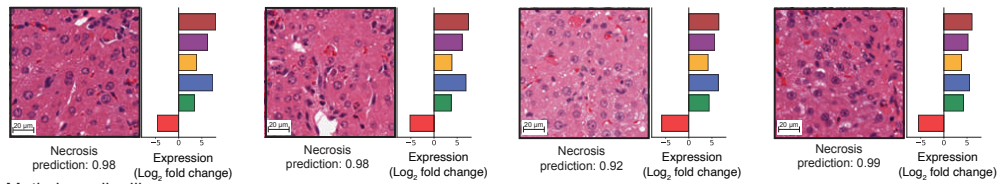

**Methylene dianiline**

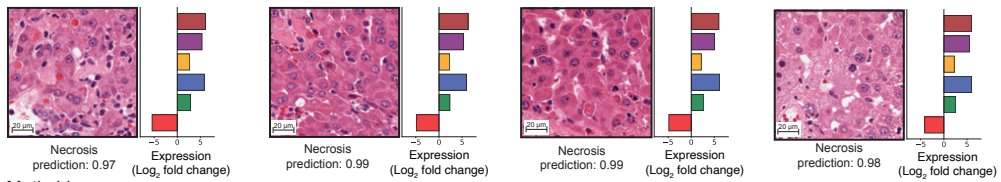

**Methyldopa**

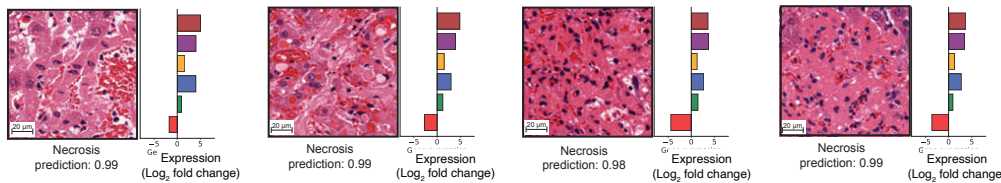

Figure S2: Caption next page.

Figure S2: **Pseudo spatially-resolved gene expression and visualization of necrosis.** **a.** H&E liver section after exposure to bromobenzene (left). Overlay of patch-level necrosis prediction. Predictions below 90% confidence are represented in blue and high-probability predictions are represented in red (center-left). Pseudo-spatially-resolved gene expression heatmaps of genes *TNFRSF12A* (center-right) and *ATF3* (right). **b.** Additional examples of necrotic patches from four studies (thioacetamide, ethionamide, methylene dianiline, and methyldopa) highlight similar upregulation of *TNFRSF12A*, *ATF3*, *DDIT3*, *MAFF* and *IFRD1*, and downregulation of *NREP*.

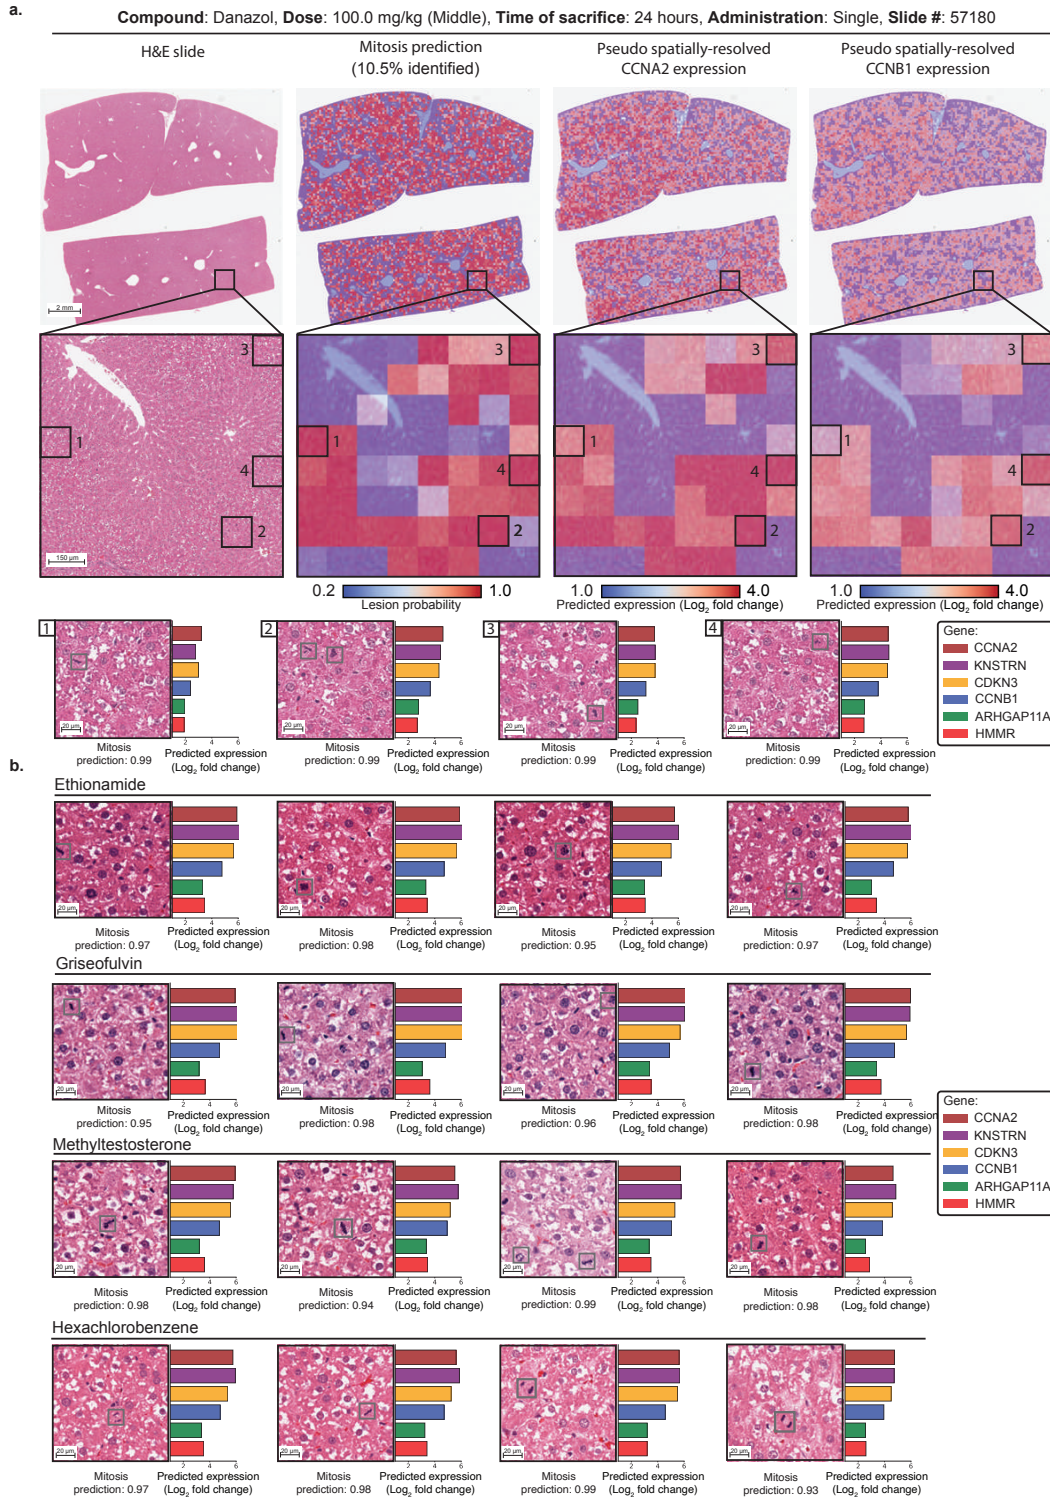

Figure S3: Caption next page.

**Figure S3: Pseudo spatially-resolved expression and visualization of mitosis.** **a.** H&E liver section after exposure to danazol (left). Overlay of patch-level bile duct proliferation prediction. Predictions below 20% confidence are represented in blue, and high-probability predictions are represented in red (center-left). Pseudo-spatially-resolved gene expression heatmaps of *CCNA2* and *CCNB1* (center-right and right). **b.** Additional examples of patches with mitosis from four studies (ethionamide, griseofulvin, methyltestosterone, and hexachlorobenzene) highlight similar upregulation of *CCNA2* and *CCNB1*, *CDKN3*, *KNSTRN*, *ARHGAP11A* and *HMMR*.

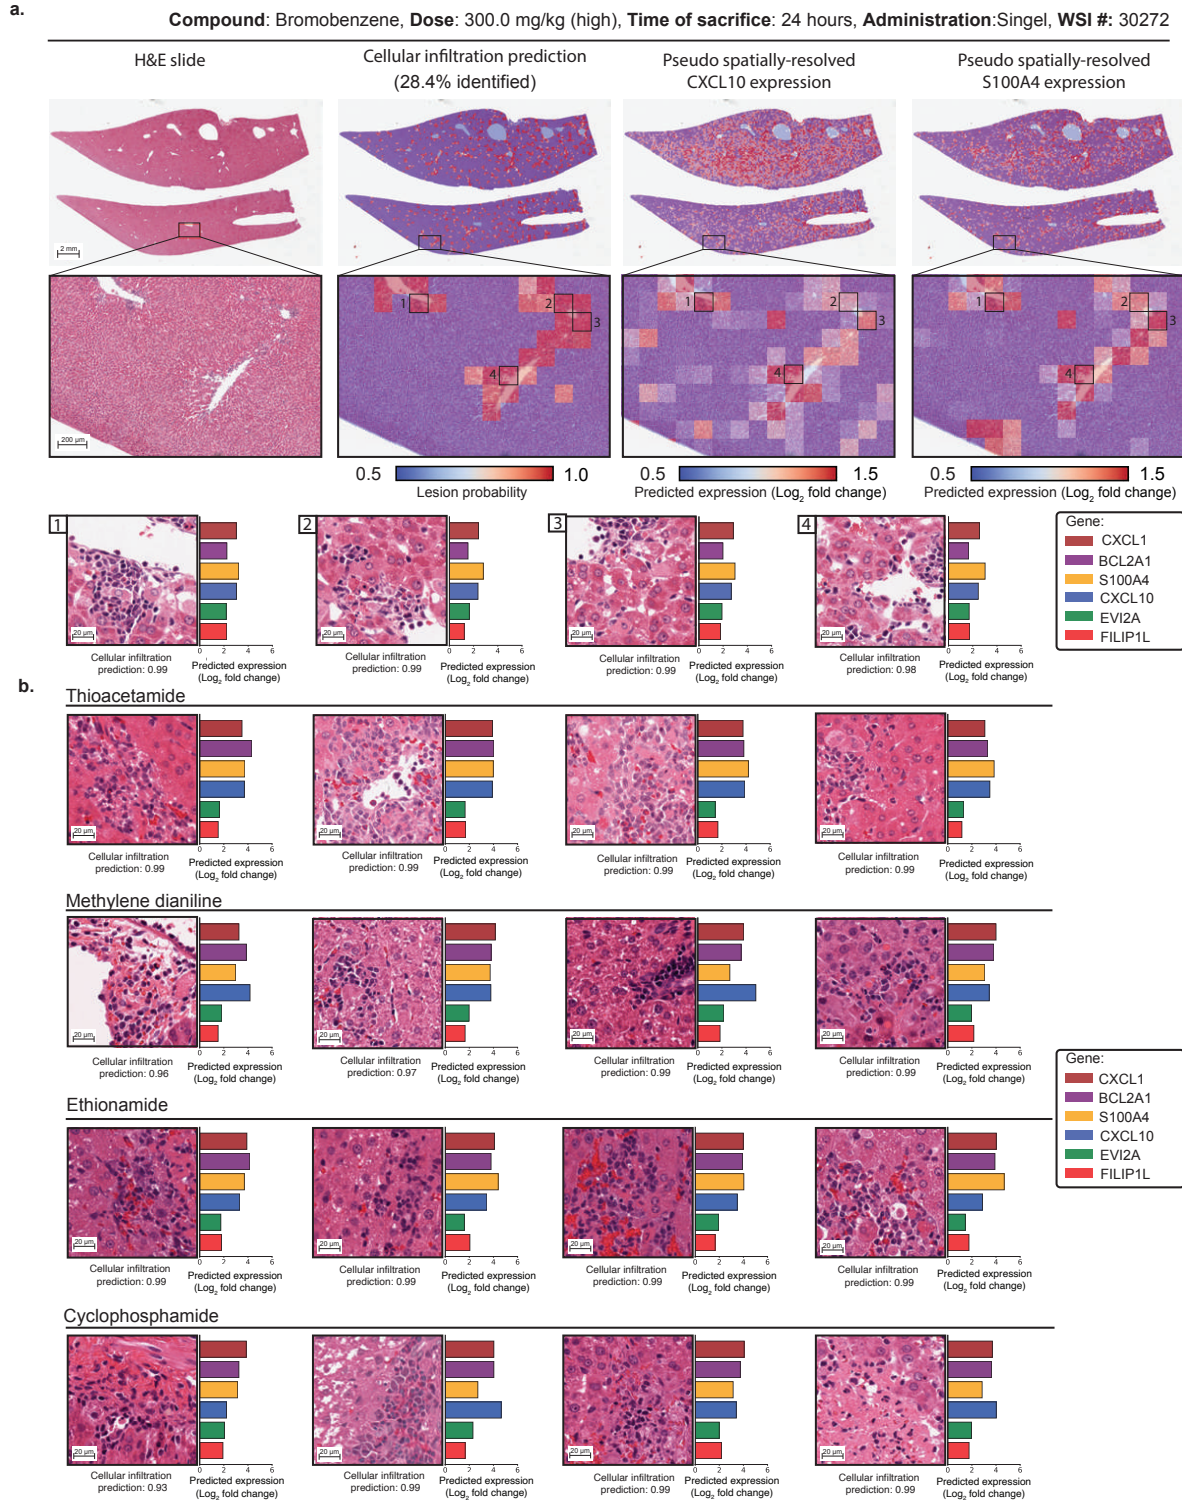

Figure S4: Caption next page.

**Figure S4: Pseudo spatially-resolved expression and visualization of cellular infiltration.**

**a.** H&E liver section after exposure to bromobenzene (left). Overlay of patch-level cellular infiltration prediction. Predictions below 50% confidence are represented in blue and high-probability predictions are represented in red (center-left). Pseudo-spatially-resolved gene expression heatmaps of *CXCL10* and *S100A4* (center-right and right). **b.** Additional examples of patches with cellular infiltration from four other studies (thioacetamide, methylene dianiline, ethionamide, and cyclophosphamide) highlight similar upregulation of *CXCL10*, *S100A4*, *CXCL1*, *BCL2A1*, *EVI2A* and *FILIP1L*.

a.

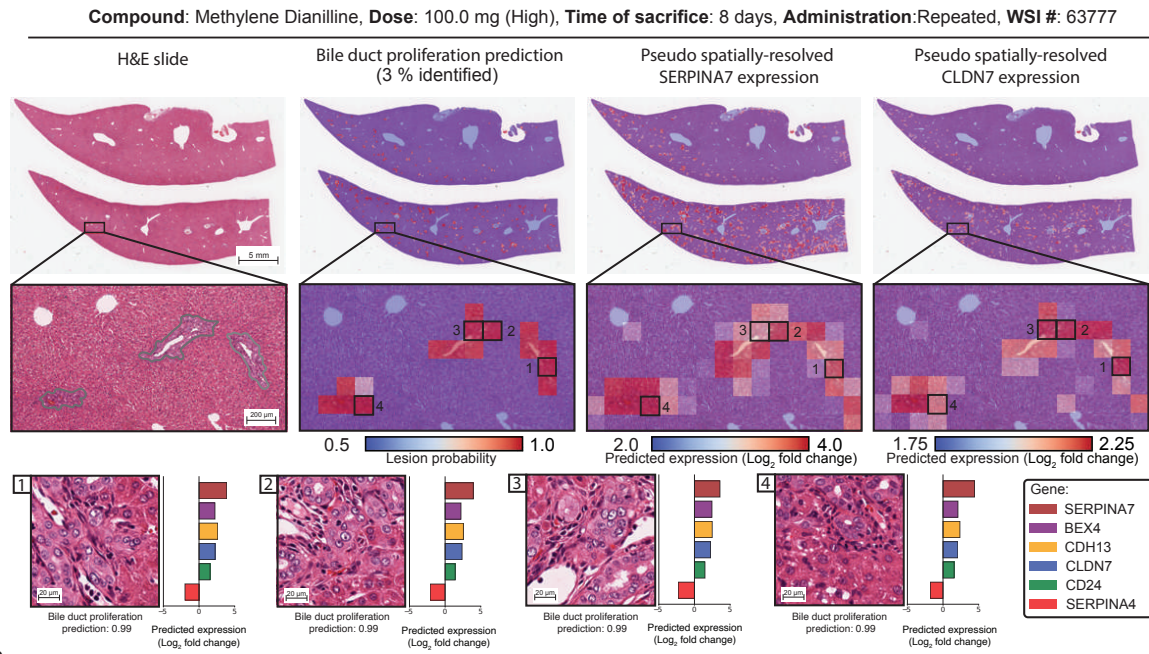

b.

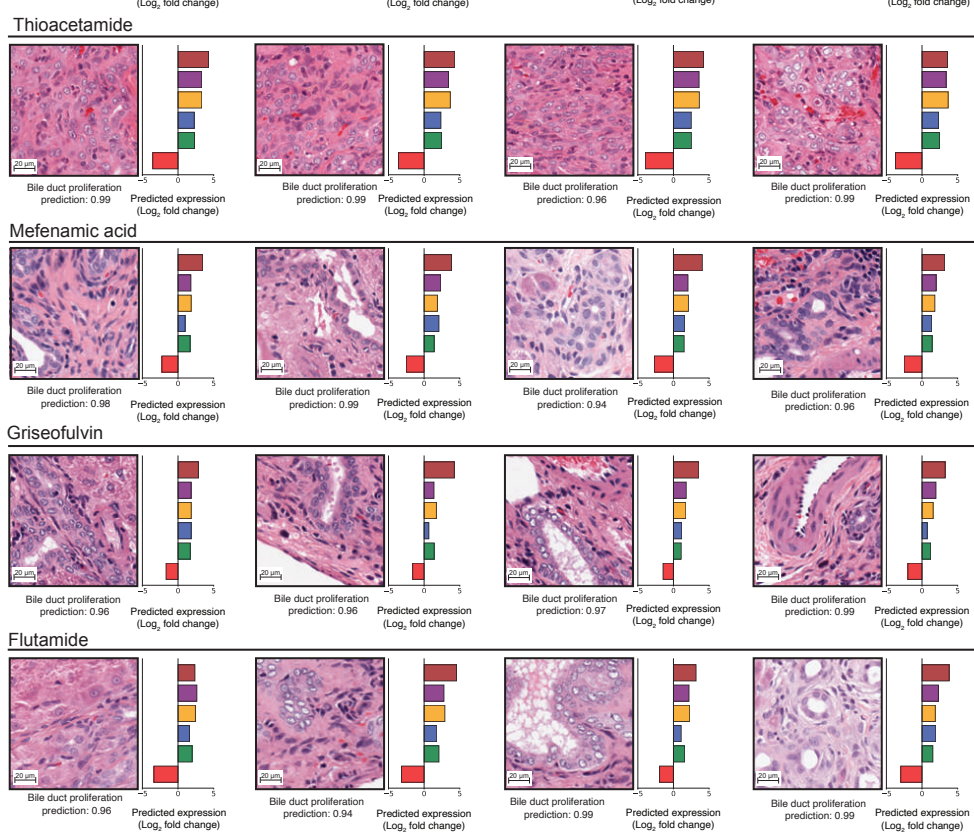

Figure S5: Caption next page.



Figure S5: **Pseudo spatially-resolved expression and visualization of bile duct proliferation.** **a.** H&E liver section after exposure to methylene dianiline (left). Overlay of patch-level bile duct proliferation prediction. Predictions below 50% confidence are represented in blue and high-probability predictions are represented in red (center-left). Pseudo-spatially-resolved gene expression heatmaps of *SERPINA7* and *CLDN7* (center-right and right). **b.** Additional examples of patches with bile duct proliferation from four other studies (thioacetamide, mefenamic acid, griseofulvin and flutamide) highlight similar upregulation of *SERPINA7*, *CLDN7*, *BEX4*, *CDH13* and *CD24*, and downregulation of *SERPINA4*.

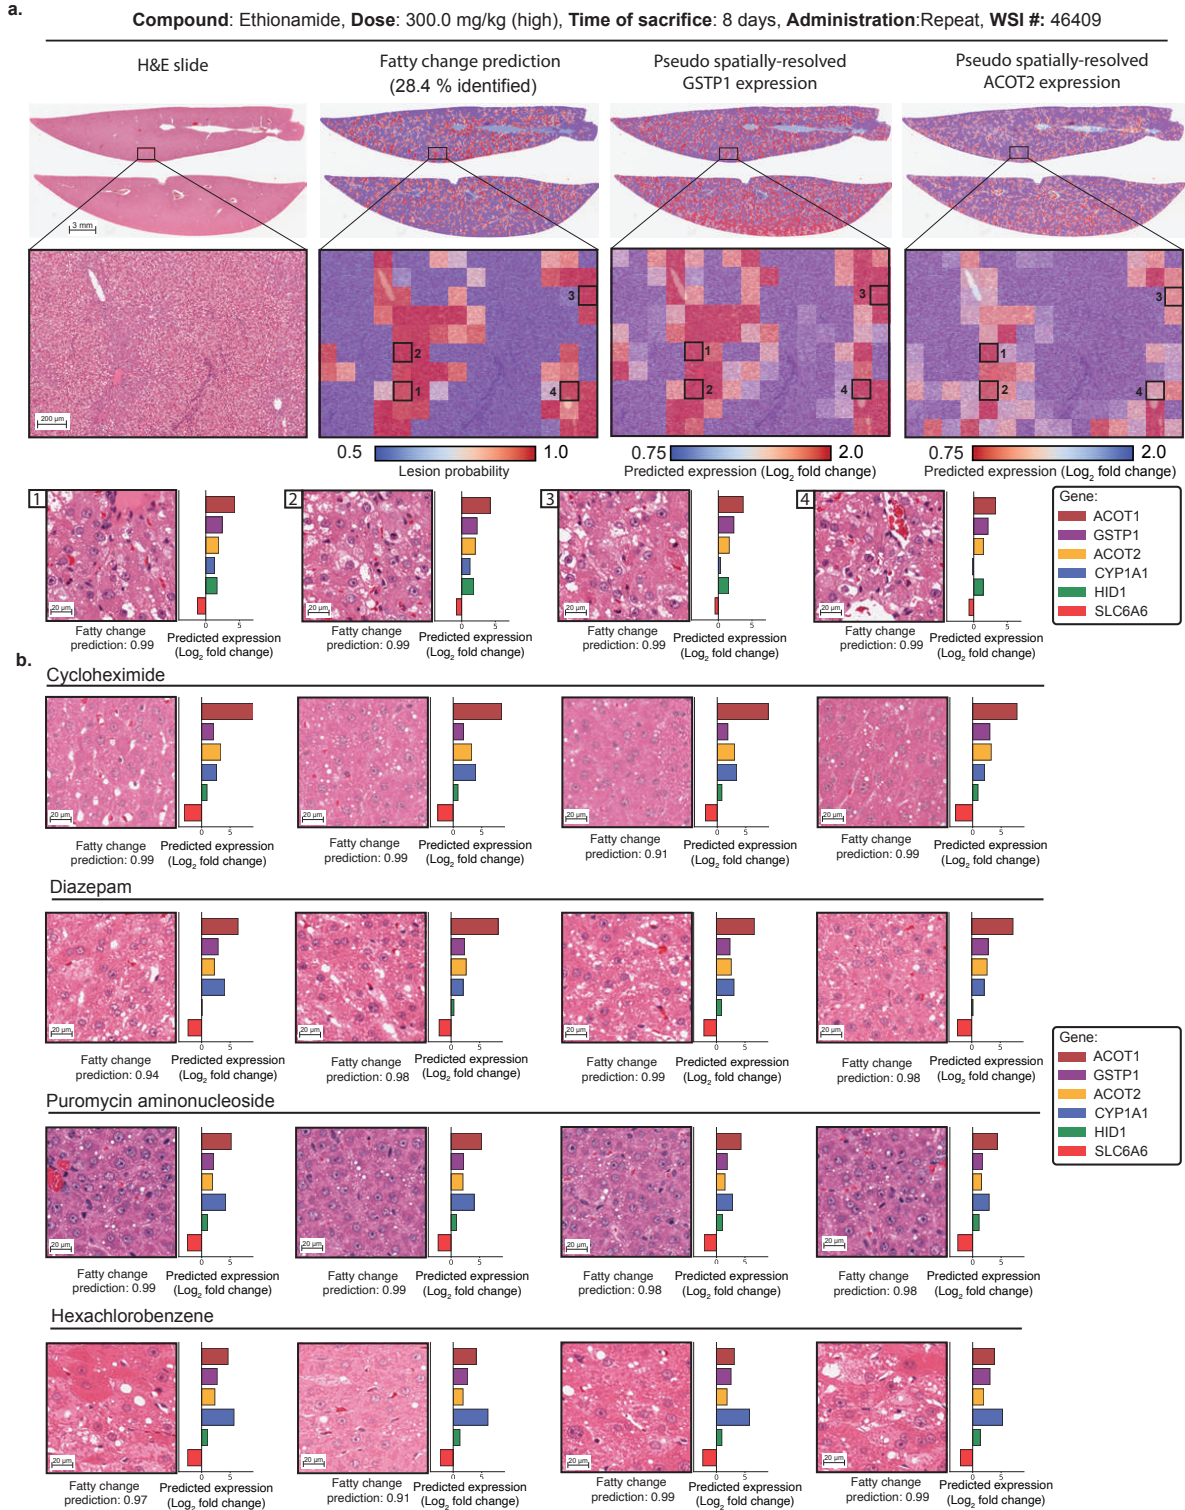

Figure S6: Caption next page.

Figure S6: **Pseudo spatially-resolved expression and visualization of fatty change.** **a.** H&E liver section after exposure to ethionamide (left). Overlay of patch-level fatty change prediction. Predictions below 50% confidence are represented in blue and high-probability predictions are represented in red (center-left). Pseudo-spatially-resolved gene expression heatmaps of *GSTP1* and *ACOT2* (center-right and right). **b.** Additional examples of patches with fatty change from four other studies (cycloheximide, diazepam, puromycin aminonucleoside and hexachlorobenzene) highlight similar upregulation of *GSTP1*, *ACOT2*, *ACOT1*, *HID1* and *CYP1A1* and down-regulation of *SLC6A6*.

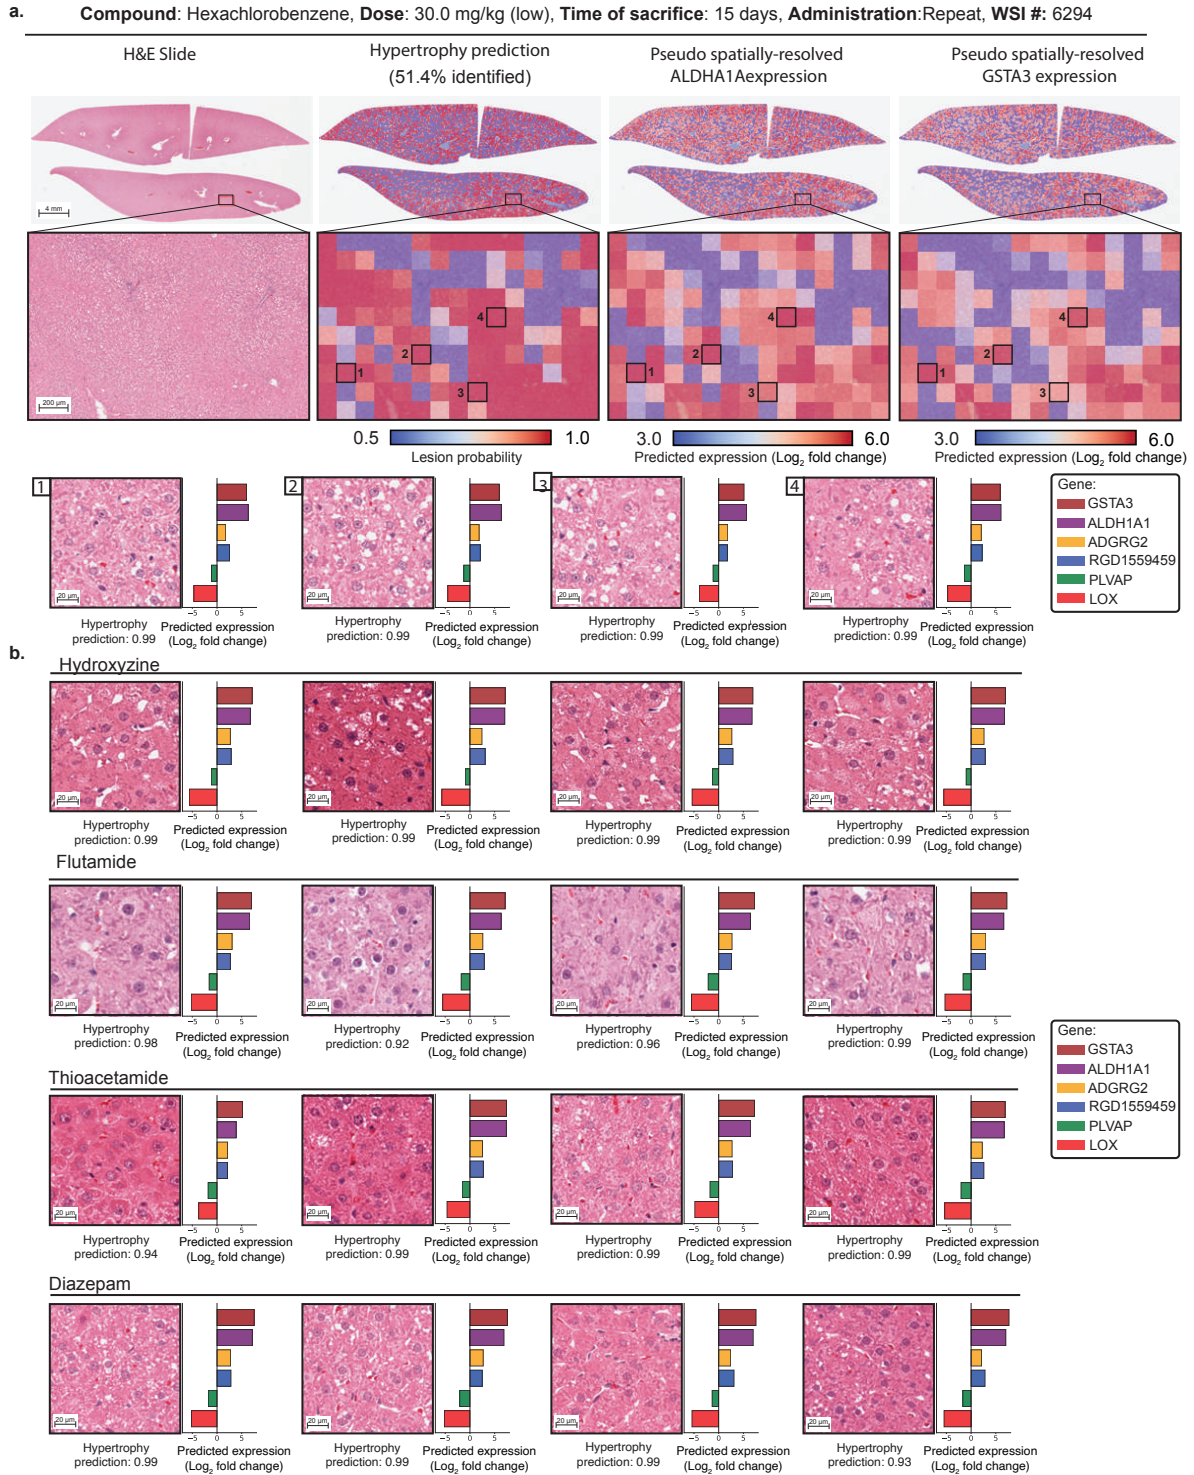

Figure S7: Caption next page.

Figure S7: **Pseudo spatially-resolved expression and visualization of hypertrophy.** **a.** H&E liver section after exposure to hexachlorobenzene (left). Overlay of patch-level hypertrophy prediction. Predictions below 50% confidence are represented in blue and high-probability predictions are represented in red (center-left). Pseudo-spatially-resolved gene expression heatmaps of *ALDHA1A* and *GSTA3* (center-right and right). **b.** Additional examples of patches with hypertrophy from four other studies (hydroxyzine, flutamide, thioacetamide, and diazepam) highlight similar upregulation of *GSTA3*, *ALDH1A1*, *ADRG2* and *RGD1559459*, and downregulation of *PLAVP* and *LOX*.

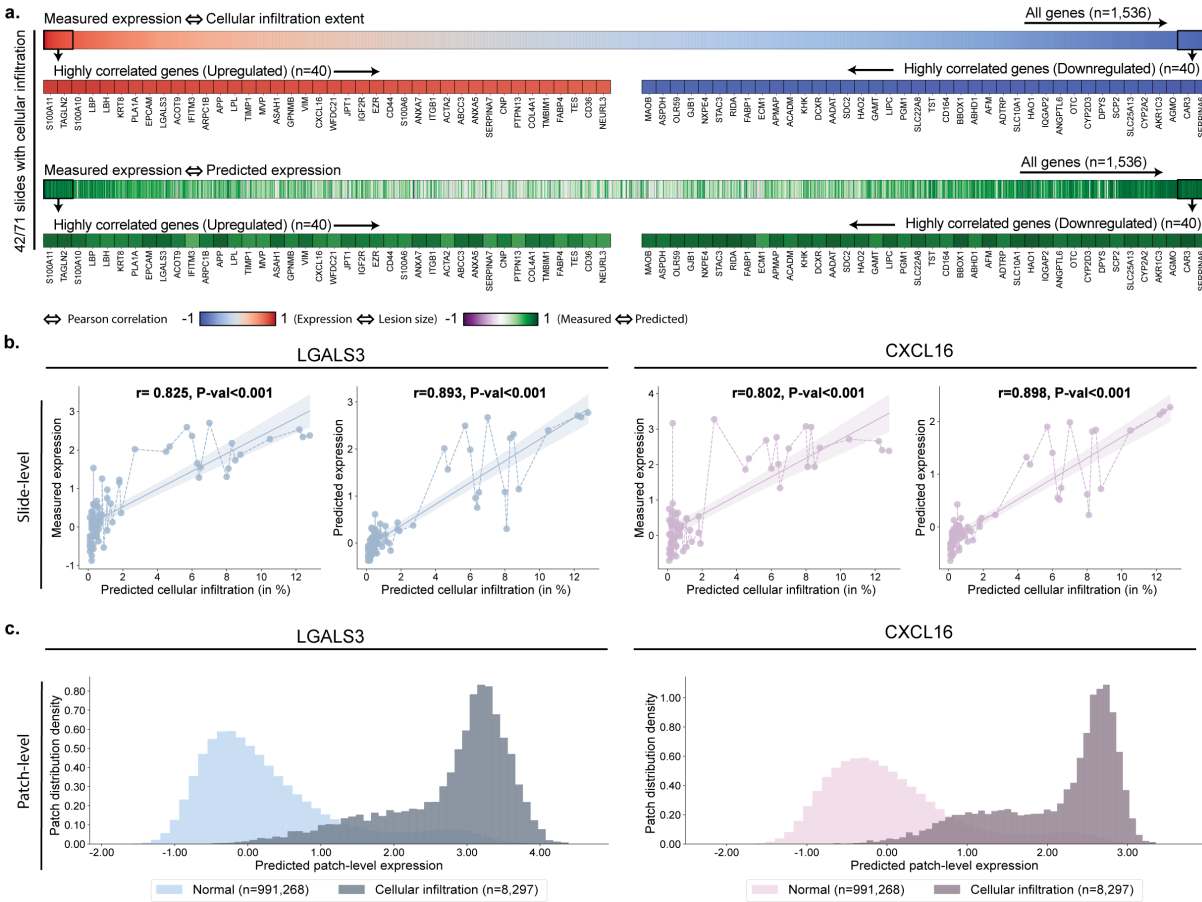

**Figure S8: Morphomolecular analysis of cellular infiltration in methylene dianiline. a.** For each slide-expression pair, we correlate the percentage of cellular infiltration predicted by the lesion classifier with the measured gene expression. Genes with a high correlation between measured expression and lesion size define morphomolecular signatures associated with the compound. **b.** Correlation between the estimated percentage of the slide containing cellular infiltration and the gene expression of *LGALS3* and *CXCL16* (measured with microarray and predicted with GEESE). P-value derived from testing the two-sided null hypothesis of non-correlation. **c.** Distribution of patch-level expression for patches predicted as normal (n=991,268) and patches predicted as containing cellular infiltration (n=8,297).

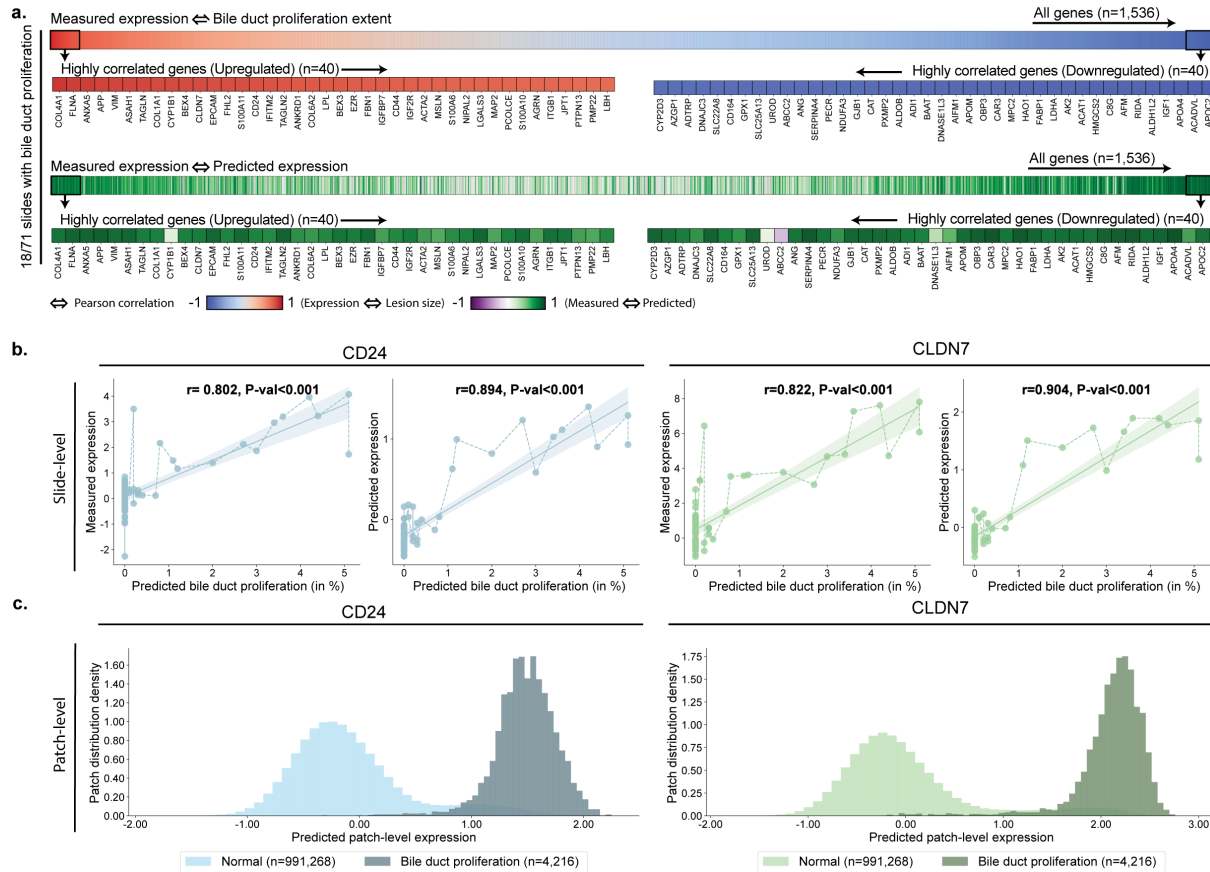

**Figure S9: Morphomolecular analysis of bile duct proliferation detection in methylene dianiline.** **a.** For each slide-expression pair, we correlate the percentage of bile duct proliferation predicted by the lesion classifier with the measured gene expression. Genes with a high correlation between measured expression and lesion size define morphomolecular signatures associated with the compound. **b.** Correlation between the estimated percentage of the slide containing bile duct proliferation and the gene expression of *CD24* and *CLDN7* (measured with microarray and predicted with GESE). P-value derived from testing the two-sided null hypothesis of non-correlation. **c.** Distribution of patch-level expression for patches predicted as normal (n=991,268) and patches predicted as containing bile duct proliferation (n=4,216).

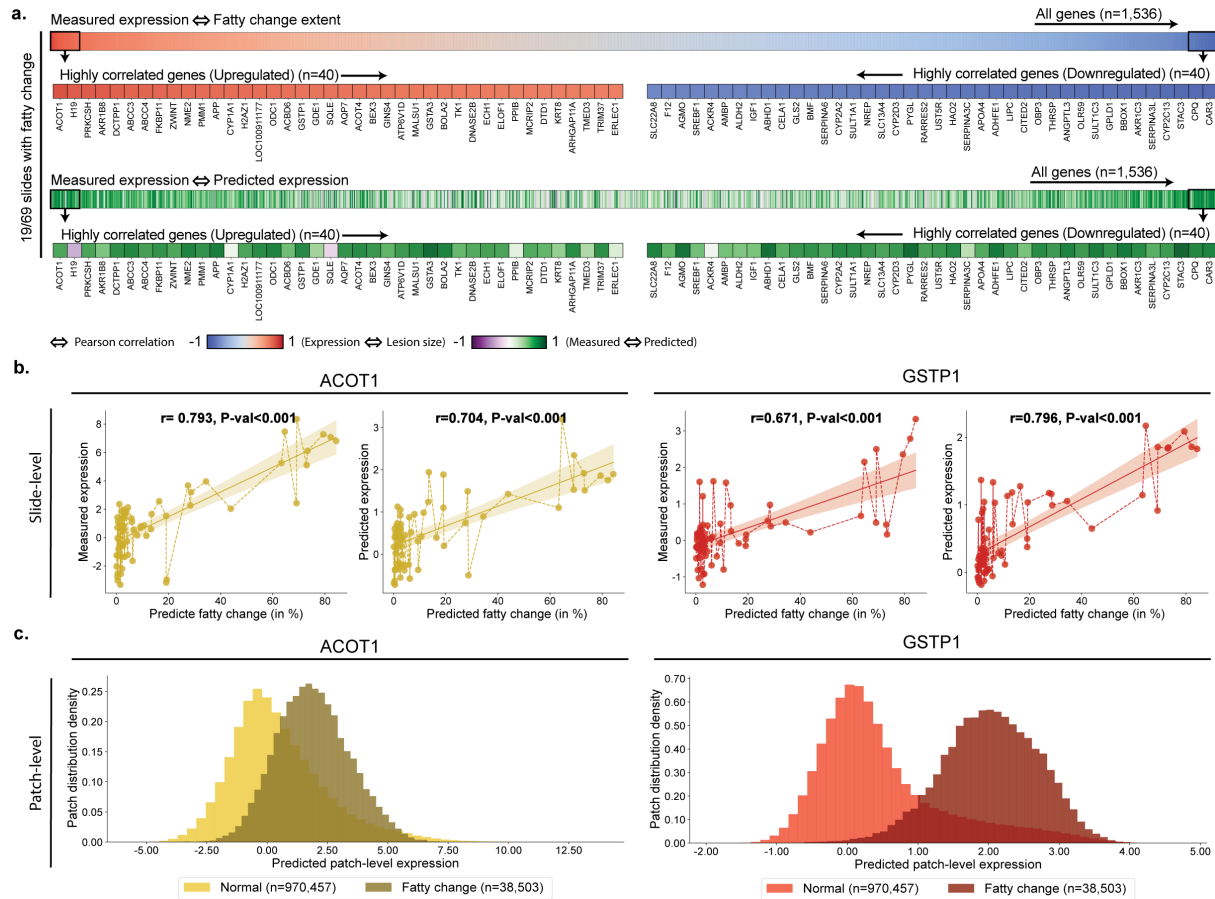

**Figure S10: Morphomolecular analysis of fatty change detection in ethionamide.** **a.** For each slide-expression pair, we correlate the percentage of fatty change predicted by the lesion classifier with the measured gene expression. Genes with a high correlation between measured expression and lesion size define morphomolecular signatures associated with the compound. **b.** Correlation between the estimated percentage of the slide containing fatty change and the gene expression of *ACOT1* and *GSTP1* (measured with microarray and predicted with GEENSE). P-value derived from testing the two-sided null hypothesis of non-correlation. **c.** Distribution of patch-level expression for patches predicted as normal (n=970,457) and patches predicted as containing fatty change (n=38,503).



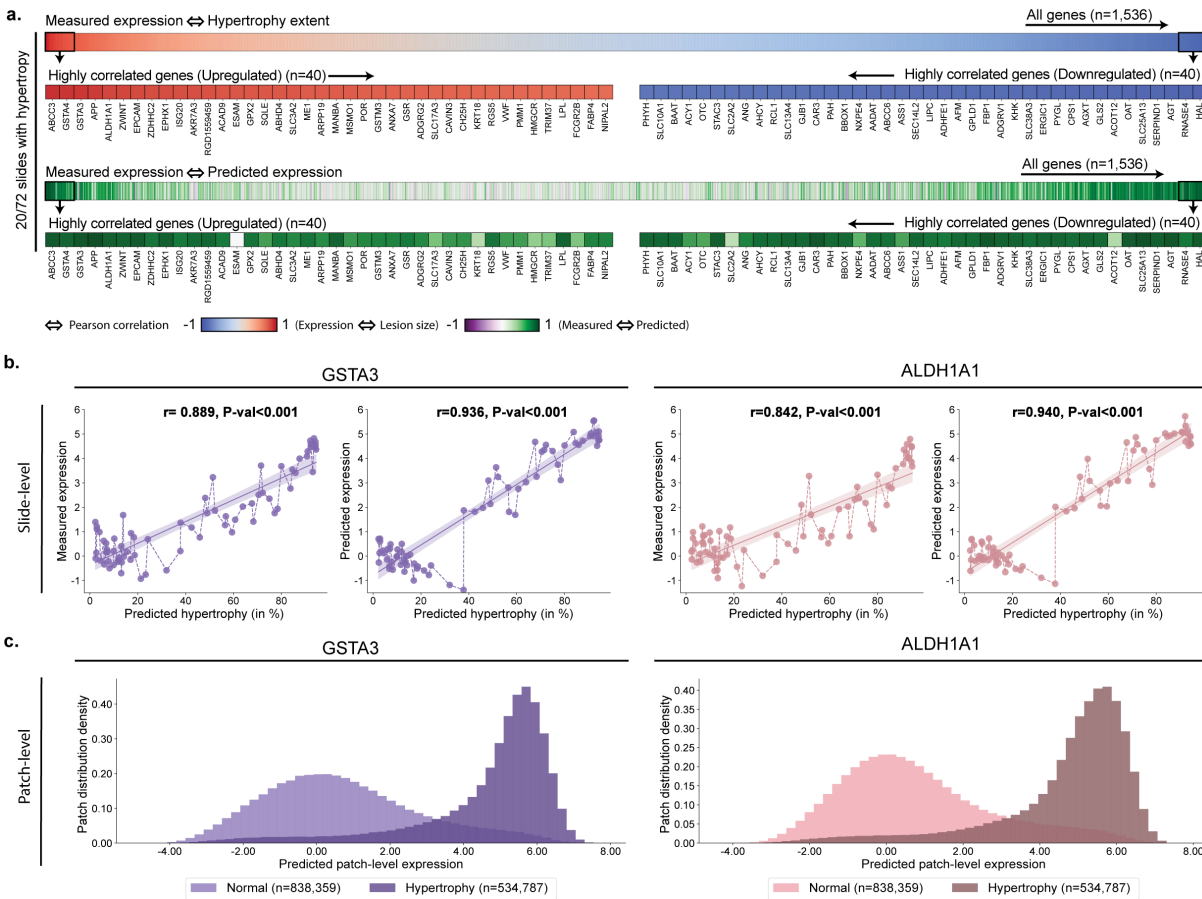

**Figure S11: Morphomolecular analysis of hypertrophy detection in hexachlorobenzene.**  
**a.** For each slide-expression pair, we correlate the percentage of hypertrophy predicted by the lesion classifier with the measured gene expression. Genes with a high correlation between measured expression and lesion size define morphomolecular signatures associated with the compound. **b.** Correlation between the estimated percentage of the slide containing hypertrophy and the gene expression of *GSTA3* and *ALDH1A1* (measured with microarray and predicted with GEESE). P-value derived from testing the two-sided null hypothesis of non-correlation. **c.** Distribution of patch-level expression for patches predicted as normal (n=838,359) and patches predicted as containing hypertrophy (n=534,787).

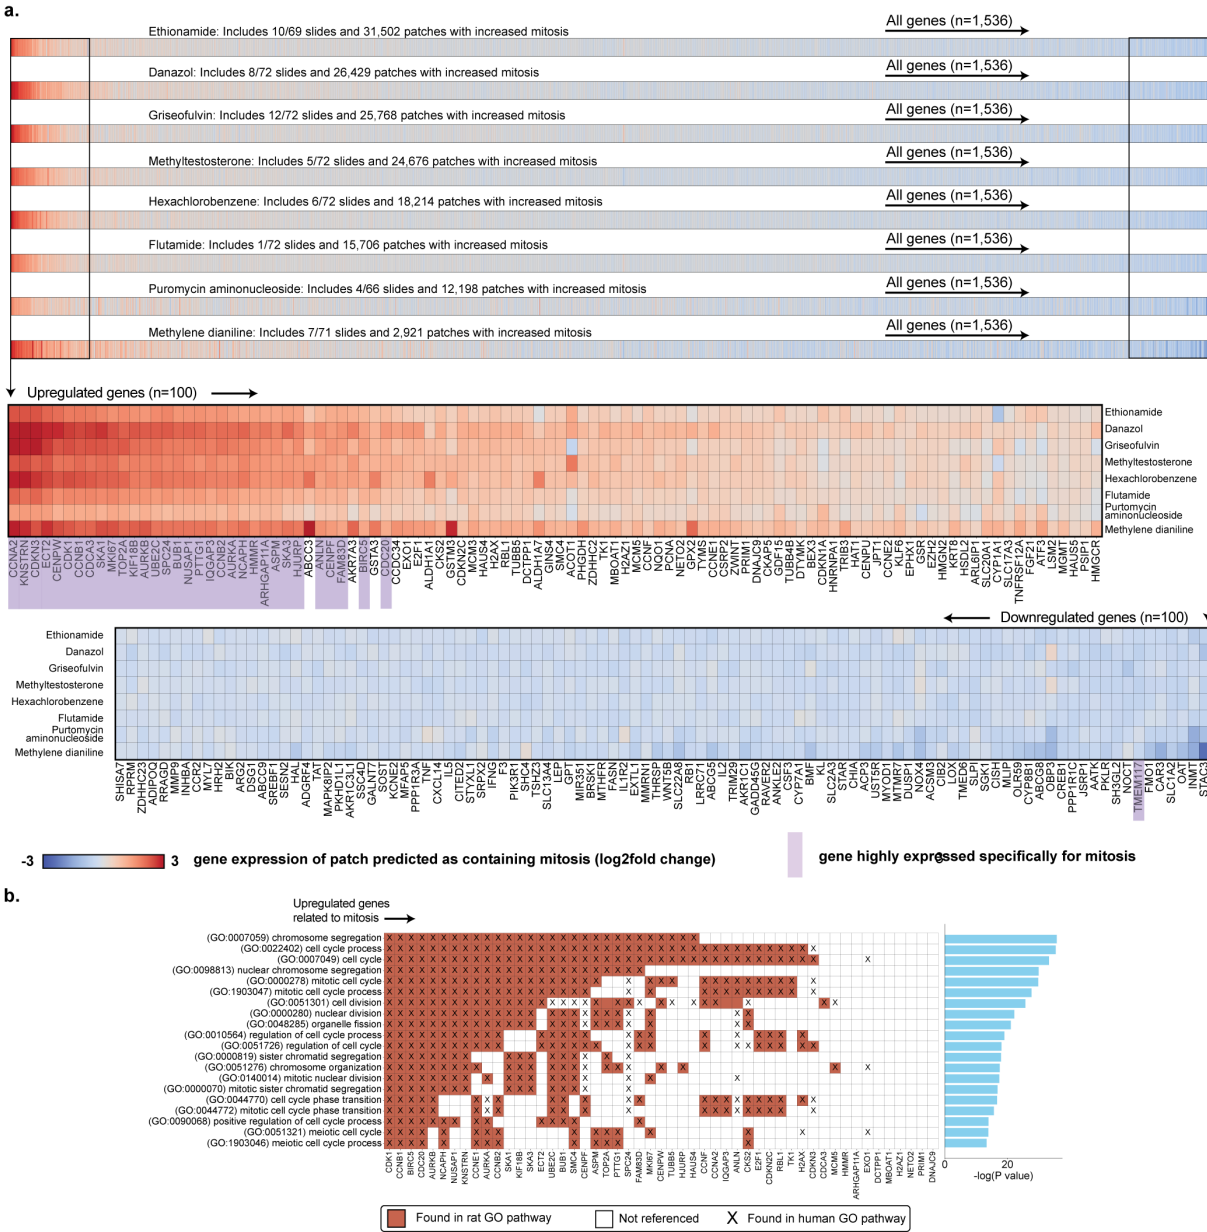

Figure S12: Caption next page.

Figure S12: **Cross-study analysis of the molecular signature of mitosis.** **a.** Average predicted gene expression of patches with mitosis in eight different studies from TG-GATEs test set. Zoom of the top 100 upregulated (top, red) and downregulated genes (bottom, blue). Genes are sorted in decreasing order by their absolute mean gene expression across all considered studies. **b.** Top 20 biological pathways (ranked by highest p-values) of the 51 upregulated genes identified as specific to increased mitosis (**table S9**). The analysis was conducted using the rat genome database (RGD). Identified pathways, including cell cycle, mitotic nuclear division, and DNA replication, are highly relevant to mitosis. Most of the genes found, such as *CCNA2*, *CCNB1*, and *CCNB2* from the cyclin family, are known to play crucial roles in cell division and reproduction pathways are closely related to mitosis. Other genes, such as *HMMR* (involved in microtubule stabilization) and *ARHGAP11A* (associated with Rho GTPase signaling), demonstrate a less direct linkage but are still involved in related processes such as cytoskeletal organization. A lower p-value, obtained using hypergeometric distribution test, signifies a higher degree of over-representation.

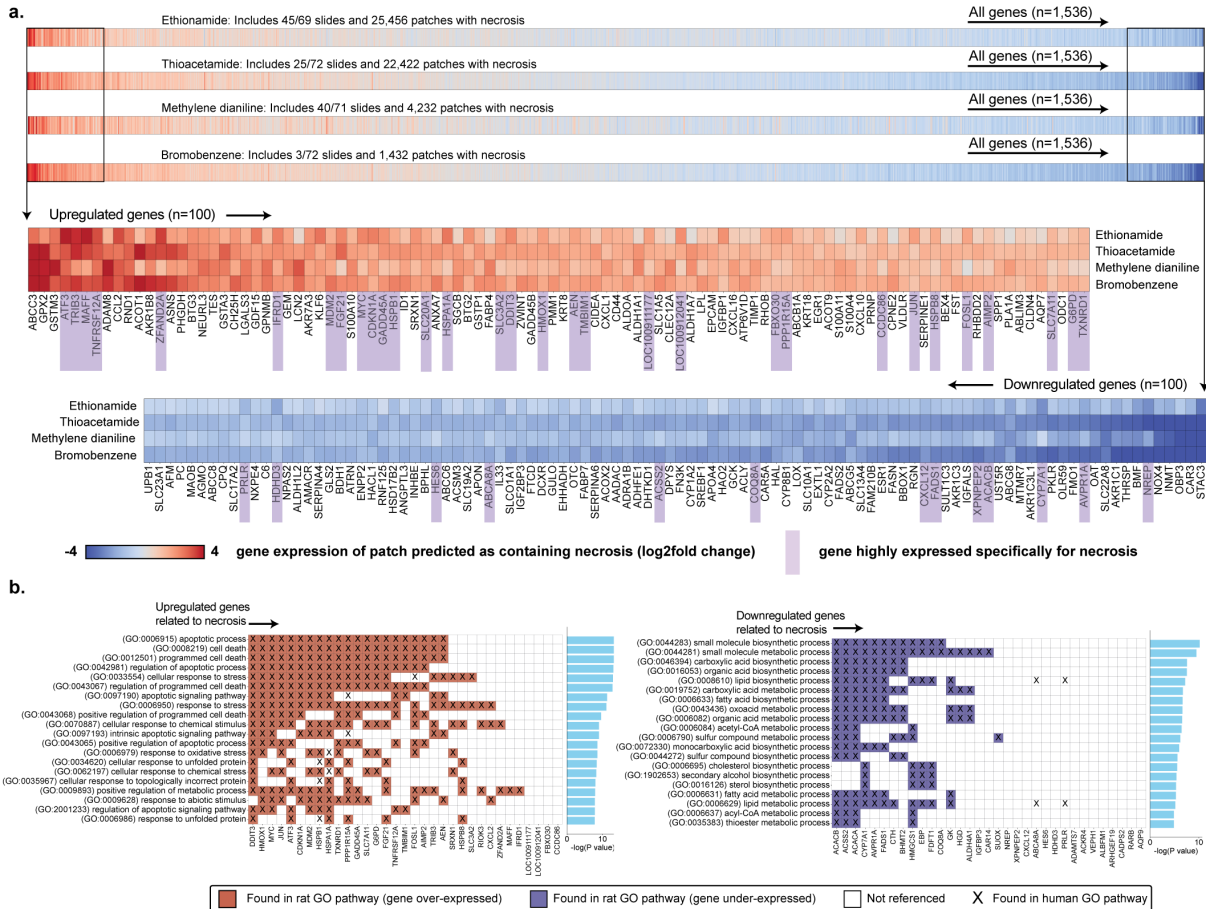

**Figure S13: Cross-study analysis of the molecular signature of necrosis. a.** Average predicted gene expression of patches with necrosis in four different studies from TG-GATES test set. Zoom of the top 100 upregulated (top, red) and downregulated genes (bottom, blue). Genes are sorted in decreasing order by their absolute mean gene expression across all considered studies. **b.** Top 20 biological pathways (ranked by highest p-values) of the 33 upregulated genes identified as specific to necrosis (left), and the top 20 biological pathways (ranked by highest p-values) of the 33 downregulated genes identified as specific to necrosis (right) (**table S10**). The analysis was conducted using the rat genome database (RGD). Most identified biological pathways, including the apoptotic process, cell death, and cellular response to stress, are highly relevant to cellular necrosis. We observe known genes such as *ATF3* (known for modulating the stress response), *TNFRSF12A* (involved in inflammation and cell death), *HMOX1* (associated with the oxidative stress response), and *MYC* (playing roles in the cell cycle, apoptosis, and DNA damage response). Other genes like *DDIT3*, *TRIB3*, *FOSL1*, and *CXCL2* are also upregulated and associated with processes like response to oxidative stress, cellular response to unfolded protein, and cellular response to chemical stress. Conversely, genes such as *ACSS2*, *ACACA*, *CYP7A1*, and *AVPRIA* are downregulated and linked to small molecule biosynthetic processes, lipid biosynthetic processes, and fatty acid metabolic processes. Other genes like *MAFF* (a gene implicated in transcriptional regulation) or *NREP* (a gene known for its involvement in neural development and tissue repair) demonstrate a less known direct linkage to necrosis despite showing high correlation with necrosis in our analysis. A lower p-value, obtained using hypergeometric distribution test, signifies a higher degree of over-representation.

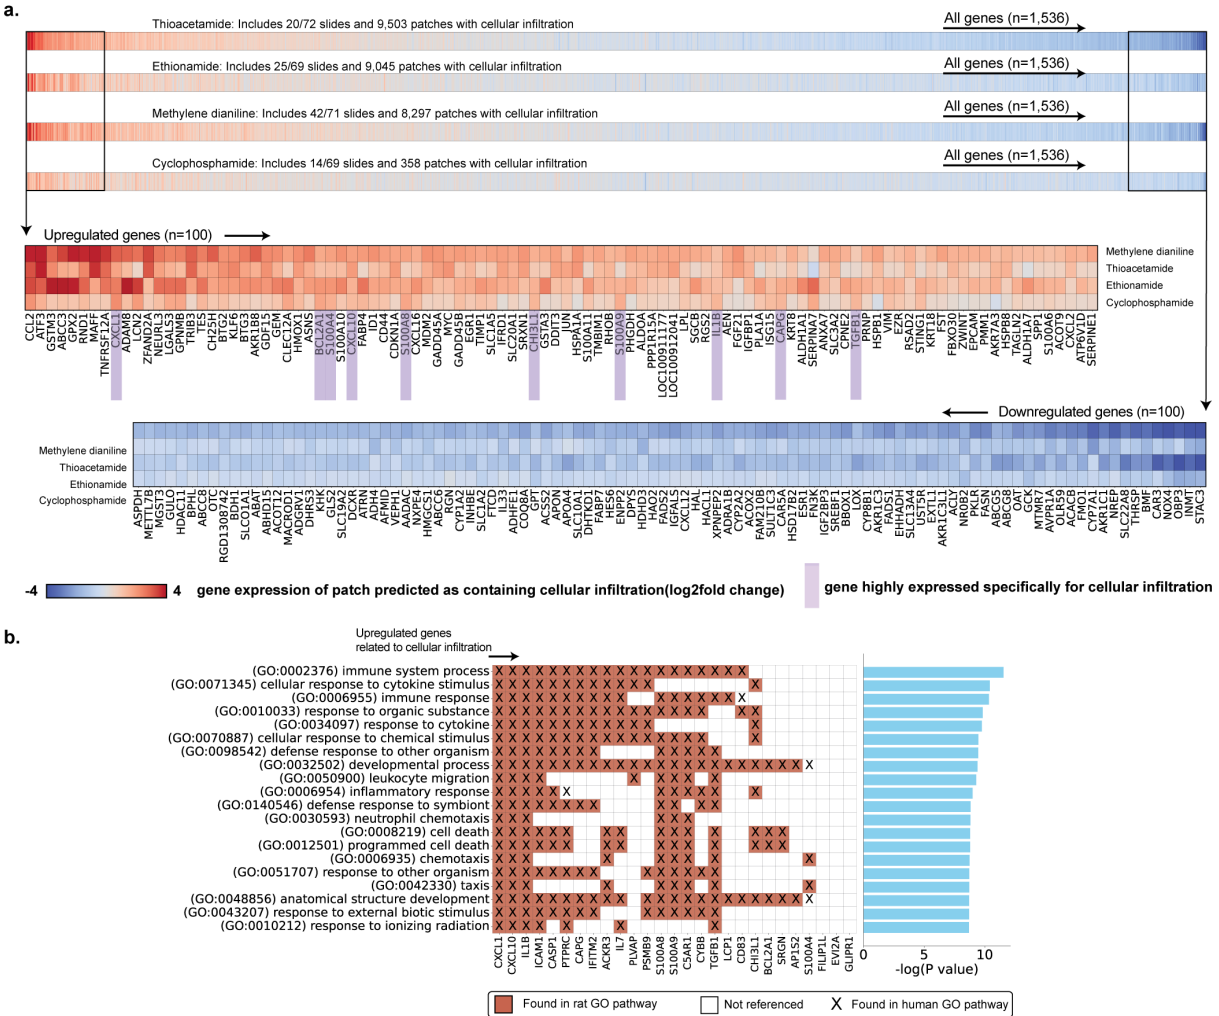



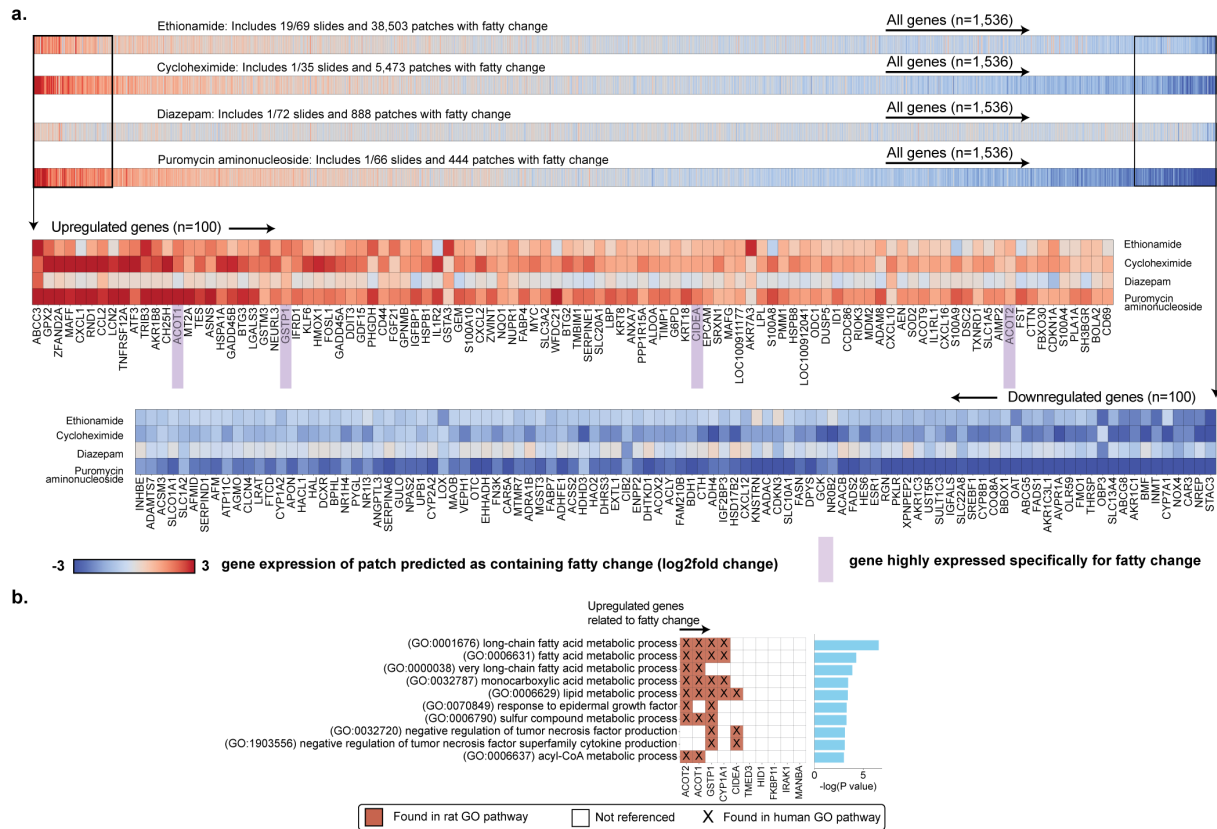

**Figure S16: Cross-study analysis of the molecular signature of fatty change.** **a.** Average predicted gene expression of patches with fatty change in four different studies from TG-GATEs test set. Zoom of the top 100 upregulated (top, red) and downregulated genes (bottom, blue). Genes are sorted in decreasing order by their absolute mean gene expression across all considered studies. **b.** Top 10 biological pathways (ranked by highest p-values) linked to the 10 upregulated genes identified as specific to fatty change (**table S13**). Analysis was conducted using the rat genome database (RGD). Some identified pathways, including fatty acid metabolic process, lipid metabolic process, and response to oxidative stress, support the relevance of the identified genes to fatty change. Genes such as *ACOT1* and *ACOT2* from the ACOT family, which are involved in the hydrolysis of acyl-CoA thioester compounds, a key process in lipid metabolism are highly relevant to fatty change. Additionally, *GSTP1*, a gene implicated in detoxification and the response to oxidative stress, is also upregulated in fatty change. A lower p-value, obtained using hypergeometric distribution test, signifies a higher degree of over-representation.

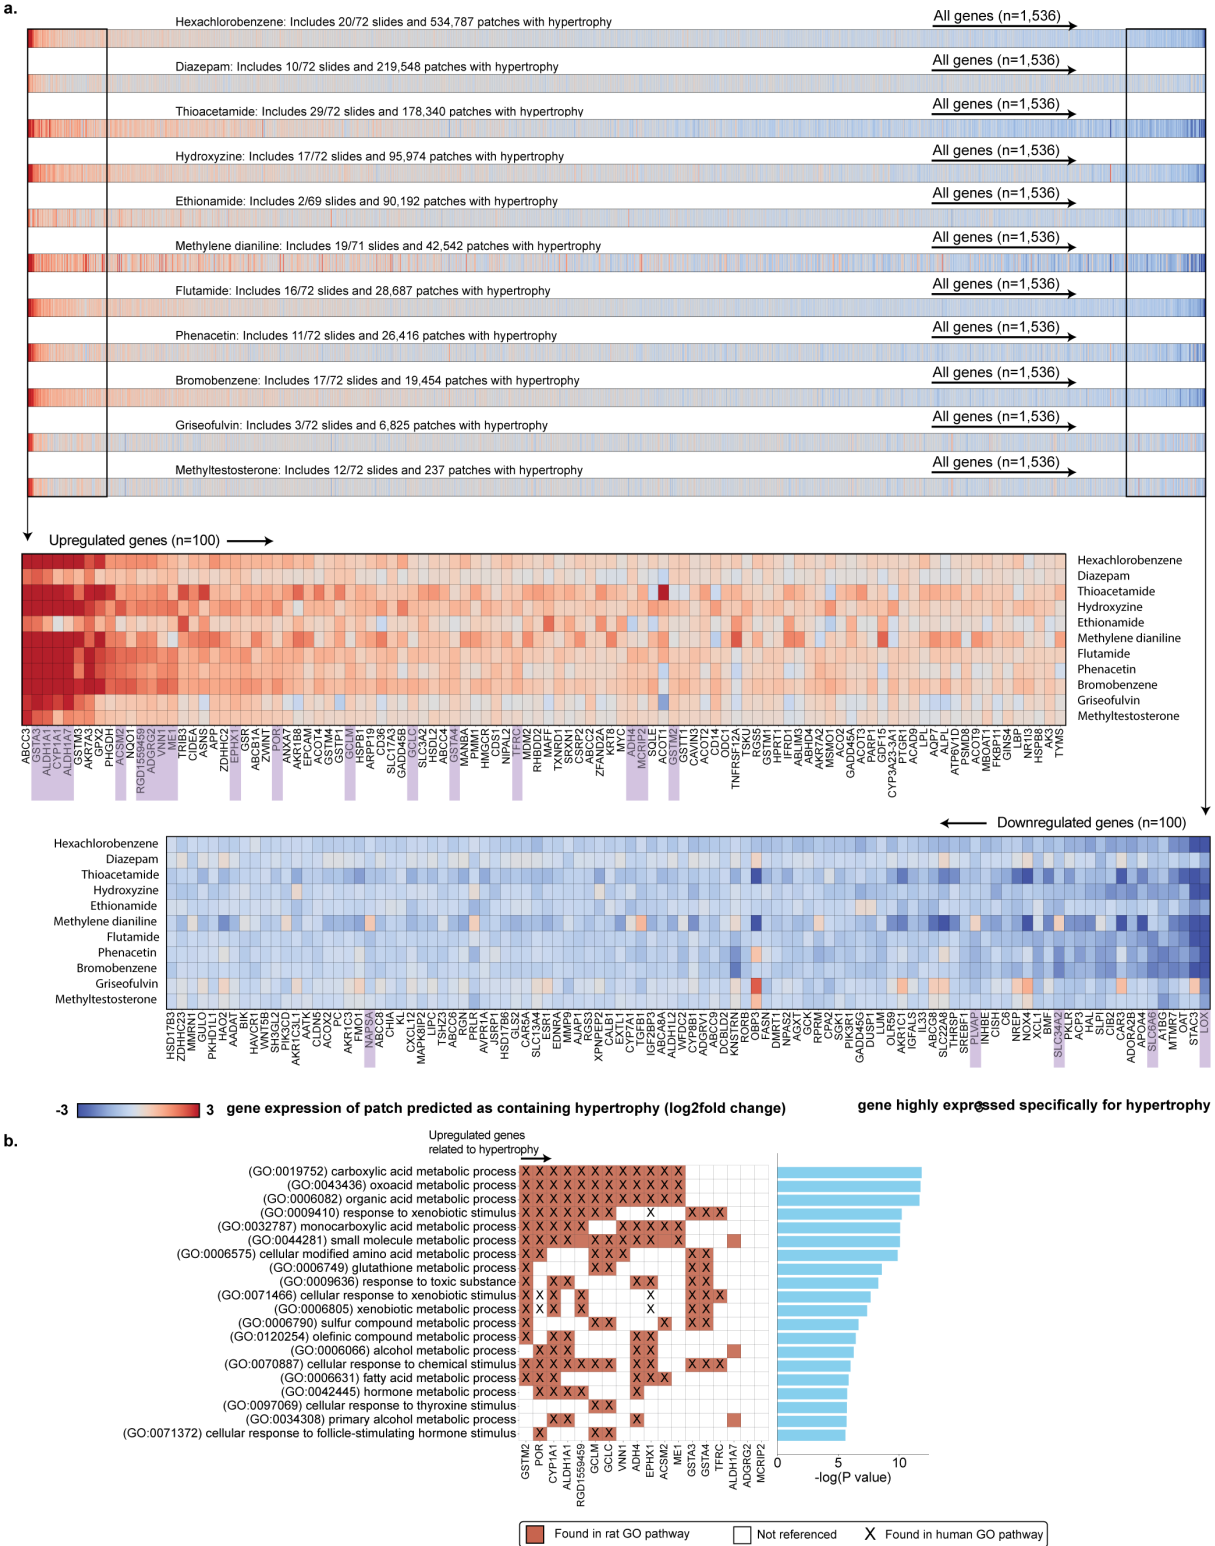

Figure S17: Caption next page



**Figure S17: Cross-study analysis of the molecular signature of hypertrophy. a.** Average predicted gene expression of patches with hypertrophy in eleven different studies from TG-GATES test set. Zoom of the top 100 upregulated (top, red) and downregulated genes (bottom, blue). Genes are sorted in decreasing order by their absolute mean gene expression across all considered studies. **b.** Top 20 biological pathways (ranked by highest p-values) linked to the 18 genes upregulated genes identified as specific to hypertrophy (**table S14**). Analysis was conducted using the rat genome database (RGD). Genes involved in managing increased metabolic demands, such as *ACSM2*, *VNN1*, and *ME1*, are relevant in different aspects of metabolism—fatty acid, lipid, and glucose metabolism, respectively. Genes like *GSTA3*, *ALDH1A1*, and *ALDH1A7* are involved in detoxifying oxidative and aldehyde by-products, which are more prevalent as metabolic activities intensify in hypertrophic cells. The enrichment of pathways such as fatty acid metabolic process, oxidation-reduction process, and extracellular matrix organization further supports the relevance of these genes to the cellular adaptations occurring during hypertrophy. Additionally, *LOX*'s role in collagen synthesis and extracellular matrix assembly is necessary for the structural adaptation of tissues undergoing hypertrophy. A lower p-value, obtained using hypergeometric distribution test, signifies a higher degree of over-representation.

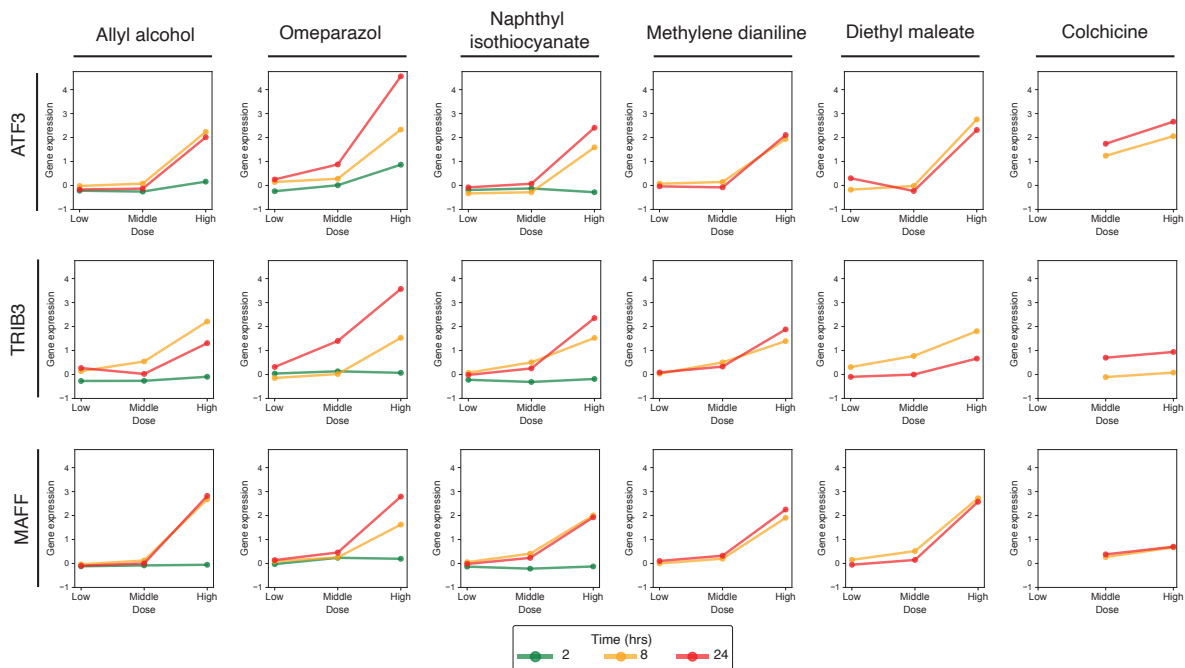

**Figure S18: Translation of necrosis genetic biomarkers to human in vitro primary human hepatocytes cell lines.** Dose-response relationship of six necrosis-inducing selected compounds of in vitro human cell lines at three different time points. Genes tested (*ATF3*, *TRIB3*, and *MAFF*) were identified as connected to necrosis in the in vivo rat experiments.

| Name               | Number of slides | Number of microarrays | Split     |
|--------------------|------------------|-----------------------|-----------|
| Labetalol          | 155              | 71                    | Train/Val |
| Glibenclamide      | 159              | 71                    | Train/Val |
| Methyltestosterone | 160              | 72                    | Test      |
| Griseofulvin       | 160              | 72                    | Test      |
| Tetracycline       | 160              | 72                    | Train/Val |
| Perhexiline        | 160              | 72                    | Train/Val |
| Flutamide          | 160              | 72                    | Test      |
| Lomustine          | 160              | 72                    | Train/Val |
| Azathioprine       | 157              | 71                    | Train/Val |
| Methimazole        | 160              | 72                    | Train/Val |
| Monocrotaline      | 154              | 69                    | Train/Val |
| Pemoline           | 159              | 72                    | Train/Val |
| Chlormezanone      | 159              | 71                    | Train/Val |
| Metformin          | 160              | 72                    | Test      |
| Ethinylestradiol   | 159              | 71                    | Train/Val |
| Tamoxifen          | 160              | 72                    | Train/Val |
| Methyldopa         | 160              | 72                    | Test      |
| Vitamin a          | 158              | 72                    | Train/Val |
| Tacrine            | 148              | 65                    | Train/Val |
| Ciprofloxacin      | 160              | 72                    | Train/Val |
| Chloramphenicol    | 160              | 72                    | Train/Val |
| Nitrofurazone      | 157              | 72                    | Train/Val |
| Imipramine         | 159              | 72                    | Train/Val |
| Moxisylyte         | 160              | 72                    | Train/Val |
| Iproniazid         | 160              | 72                    | Train/Val |
| Amitriptyline      | 158              | 72                    | Train/Val |
| Hydroxyzine        | 160              | 72                    | Test      |
| Ibuprofen          | 157              | 71                    | Train/Val |
| Mefenamic acid     | 158              | 72                    | Test      |
| Furosemide         | 158              | 72                    | Train/Val |
| Fenofibrate        | 160              | 72                    | Train/Val |
| Chlorpropamide     | 160              | 72                    | Train/Val |
| Famotidine         | 160              | 72                    | Train/Val |
| Nifedipine         | 160              | 72                    | Train/Val |
| Chlorpheniramine   | 160              | 72                    | Train/Val |
| Diltiazem          | 159              | 72                    | Train/Val |
| Quinidine          | 159              | 72                    | Train/Val |
| Naproxen           | 153              | 69                    | Train/Val |
| Nicotinic acid     | 159              | 72                    | Train/Val |
| Ranitidine         | 160              | 72                    | Train/Val |

Table S1: **Overview of TG-GATEs compounds.** For each compound, we report the number of slides, microarrays (also corresponding to the number of pairs), and whether the study was used for training/validation or testing.

| Name                        | Number of slides | Number of microarrays | Split     |
|-----------------------------|------------------|-----------------------|-----------|
| Erythromycin ethylsuccinate | 159              | 72                    | Train/Val |
| Tannic acid                 | 158              | 72                    | Train/Val |
| Caffeine                    | 160              | 72                    | Train/Val |
| Captopril                   | 159              | 72                    | Train/Val |
| Clofibrate                  | 160              | 72                    | Train/Val |
| Naphthyl isothiocyanate     | 160              | 72                    | Train/Val |
| Enalapril                   | 160              | 72                    | Train/Val |
| Phenobarbital               | 158              | 72                    | Train/Val |
| Allyl alcohol               | 160              | 72                    | Train/Val |
| Rifampicin                  | 160              | 72                    | Train/Val |
| Carbon tetrachloride        | 225              | 72                    | Train/Val |
| Phenylbutazone              | 160              | 72                    | Train/Val |
| Isoniazid                   | 304              | 72                    | Test      |
| Acetaminophen               | 269              | 74                    | Train/Val |
| Indomethacin                | 153              | 69                    | Train/Val |
| Omeprazole                  | 160              | 72                    | Train/Val |
| Thioacetamide               | 159              | 72                    | Test      |
| Ethionine                   | 160              | 72                    | Train/Val |
| Carbamazepine               | 160              | 72                    | Train/Val |
| Chlorpromazine              | 139              | 60                    | Train/Val |
| Coumarin                    | 160              | 72                    | Train/Val |
| Allopurinol                 | 157              | 72                    | Train/Val |
| Diclofenac                  | 160              | 72                    | Train/Val |
| Wy-14643                    | 160              | 72                    | Train/Val |
| Gemfibrozil                 | 160              | 72                    | Train/Val |
| Nitrofurantoin              | 160              | 72                    | Train/Val |
| Bromobenzene                | 160              | 72                    | Test      |
| Amiodarone                  | 159              | 72                    | Train/Val |
| Sulfasalazine               | 160              | 72                    | Train/Val |
| Adapin                      | 140              | 60                    | Train/Val |
| Cimetidine                  | 160              | 72                    | Train/Val |
| Cyclophosphamide            | 160              | 72                    | Test      |
| Phenytoin                   | 160              | 72                    | Train/Val |
| Valproic acid               | 160              | 72                    | Train/Val |
| Ketoconazole                | 144              | 66                    | Train/Val |
| Ethambutol                  | 158              | 72                    | Train/Val |
| Papaverine                  | 159              | 72                    | Train/Val |
| Penicillamine               | 160              | 72                    | Train/Val |
| Disopyramide                | 159              | 72                    | Train/Val |
| Sulindac                    | 156              | 72                    | Train/Val |

Table S1: **Continuation.**

| Name                   | Number of slides | Number of microarrays | Split     |
|------------------------|------------------|-----------------------|-----------|
| Triamterene            | 160              | 72                    | Train/Val |
| Mexiletine             | 159              | 72                    | Test      |
| Tolbutamide            | 159              | 72                    | Train/Val |
| Sulpiride              | 159              | 72                    | Train/Val |
| Colchicine             | 159              | 72                    | Train/Val |
| Acarbose               | 160              | 72                    | Train/Val |
| Triazolam              | 160              | 72                    | Train/Val |
| Simvastatin            | 158              | 72                    | Train/Val |
| Clomipramine           | 160              | 72                    | Train/Val |
| Ajmaline               | 160              | 72                    | Train/Val |
| Trimethadione          | 159              | 72                    | Train/Val |
| Dantrolene             | 160              | 72                    | Train/Val |
| Terbinafine            | 160              | 72                    | Train/Val |
| Bendazac               | 159              | 72                    | Train/Val |
| Meloxicam              | 151              | 68                    | Train/Val |
| Benziodarone           | 160              | 72                    | Train/Val |
| Lornoxicam             | 151              | 69                    | Train/Val |
| Etoposide              | 159              | 72                    | Train/Val |
| Tiopronin              | 160              | 72                    | Train/Val |
| Ethionamide            | 153              | 69                    | Test      |
| Methapyrilene          | 79               | 36                    | Train/Val |
| Nimesulide             | 158              | 72                    | Train/Val |
| Disulfiram             | 159              | 72                    | Train/Val |
| Ethanol                | 160              | 72                    | Train/Val |
| Aspirin                | 160              | 72                    | Train/Val |
| Promethazine           | 160              | 72                    | Train/Val |
| Phenacetin             | 160              | 72                    | Test      |
| Bucetin                | 160              | 72                    | Train/Val |
| Chlormadinone          | 160              | 72                    | Train/Val |
| Danazol                | 160              | 72                    | Test      |
| Phenylanthranilic acid | 151              | 71                    | Train/Val |
| Acetamidofluorene      | 159              | 75                    | Train/Val |
| Cisplatin              | 156              | 70                    | Test      |
| Benzbromarone          | 157              | 72                    | Train/Val |
| Carboplatin            | 160              | 72                    | Test      |
| Nitrosodiethylamine    | 151              | 67                    | Train/Val |
| Bromoethylamine        | 160              | 72                    | Test      |
| Ticlopidine            | 159              | 71                    | Train/Val |
| Cyclosporine a         | 160              | 72                    | Test      |
| Cephalothin            | 160              | 72                    | Test      |

Table S1: **Continuation.**

| Name                      | Number of slides | Number of microarrays | Split     |
|---------------------------|------------------|-----------------------|-----------|
| Puromycin aminonucleoside | 149              | 66                    | Test      |
| Gentamicin                | 155              | 72                    | Test      |
| Doxorubicin               | 157              | 71                    | Train/Val |
| Theophylline              | 155              | 71                    | Test      |
| Acetazolamide             | 160              | 72                    | Test      |
| Cycloheximide             | 77               | 35                    | Test      |
| Tunicamycin               | 80               | 36                    | Test      |
| Phalloidin                | 60               | 18                    | Train/Val |
| Galactosamine             | 79               | 35                    | Train/Val |
| Phorone                   | 80               | 36                    | Train/Val |
| Tnfa                      | 80               | 36                    | Train/Val |
| Buthionine sulfoximine    | 80               | 36                    | Train/Val |
| Diethyl maleate           | 80               | 36                    | Train/Val |
| Diazepam                  | 160              | 72                    | Test      |
| Hexachlorobenzene         | 160              | 72                    | Test      |
| Rosiglitazone maleate     | 160              | 72                    | Train/Val |
| Rotenone                  | 159              | 72                    | Train/Val |
| Dexamethasone             | 80               | 36                    | Train/Val |
| Fluoxetine hydrochloride  | 160              | 72                    | Train/Val |
| Methylene dianiline       | 159              | 71                    | Test      |
| Desmopressin acetate      | 160              | 72                    | Train/Val |
| Butylated hydroxyanisole  | 160              | 72                    | Train/Val |
| Amphotericin b            | 132              | 57                    | Train/Val |
| 2-nitrofluorene           | 20               | 9                     | Train/Val |
| N-nitrosomorpholine       | 20               | 9                     | Train/Val |
| N-methyl-n-nitrosourea    | 20               | 9                     | Train/Val |
| Aflatoxin b1              | 20               | 11                    | Train/Val |
| Acetamide                 | 80               | 36                    | Train/Val |
| Propranolol               | 160              | 72                    | Train/Val |
| Bortezomib                | 72               | 31                    | Train/Val |
| 3-methylcholanthrene      | 80               | 36                    | Train/Val |
| Gefitinib                 | 80               | 36                    | Train/Val |
| Propylthiouracil          | 160              | 72                    | Train/Val |
| Haloperidol               | 39               | 11                    | Train/Val |
| Fluphenazine              | 159              | 72                    | Train/Val |
| Thioridazine              | 31               | 19                    | Train/Val |

Table S1: **Continuation.**

| Gene         | Pearson correlation | AUC   | R2    | MSE   |
|--------------|---------------------|-------|-------|-------|
| STAC3        | 0.762               | 0.695 | 0.546 | 0.454 |
| OAT          | 0.757               | 0.688 | 0.572 | 0.428 |
| DHTKD1       | 0.722               | 0.643 | 0.279 | 0.721 |
| TNFRSF12A    | 0.722               | 0.608 | 0.510 | 0.490 |
| KLF6         | 0.717               | 0.632 | 0.486 | 0.514 |
| RNASE4       | 0.715               | 0.636 | 0.464 | 0.536 |
| LOC100911177 | 0.714               | 0.645 | 0.498 | 0.502 |
| CXCL12       | 0.711               | 0.668 | 0.450 | 0.550 |
| S100A10      | 0.706               | 0.629 | 0.487 | 0.513 |
| CAR3         | 0.698               | 0.676 | 0.456 | 0.544 |
| LOC100912041 | 0.696               | 0.616 | 0.470 | 0.530 |
| KRT18        | 0.695               | 0.669 | 0.460 | 0.540 |
| FAM210B      | 0.688               | 0.635 | 0.416 | 0.584 |
| SLC10A1      | 0.688               | 0.595 | 0.232 | 0.768 |
| CPQ          | 0.685               | 0.614 | 0.429 | 0.571 |
| ATRN         | 0.683               | 0.630 | 0.422 | 0.578 |
| ABCC6        | 0.683               | 0.650 | 0.450 | 0.550 |
| ANG          | 0.680               | 0.637 | 0.363 | 0.637 |
| ALDH1A1      | 0.680               | 0.706 | 0.392 | 0.608 |
| BMF          | 0.673               | 0.673 | 0.383 | 0.617 |
| ODC1         | 0.664               | 0.675 | 0.394 | 0.606 |
| GSTA3        | 0.659               | 0.693 | 0.376 | 0.624 |
| SERPINA4     | 0.659               | 0.617 | 0.367 | 0.633 |
| IFRD1        | 0.658               | 0.631 | 0.391 | 0.609 |
| APOA4        | 0.657               | 0.634 | 0.372 | 0.628 |
| TIMP1        | 0.657               | 0.587 | 0.385 | 0.615 |
| NXPE4        | 0.655               | 0.606 | 0.349 | 0.651 |
| ACOT9        | 0.655               | 0.618 | 0.375 | 0.625 |
| DPYS         | 0.652               | 0.624 | 0.268 | 0.732 |
| RIOK3        | 0.651               | 0.604 | 0.406 | 0.594 |
| APP          | 0.651               | 0.621 | 0.371 | 0.629 |
| AKR7A3       | 0.651               | 0.681 | 0.364 | 0.636 |
| CLCN4        | 0.650               | 0.622 | 0.398 | 0.602 |
| CYP2D3       | 0.648               | 0.610 | 0.367 | 0.633 |
| SDC2         | 0.647               | 0.621 | 0.316 | 0.684 |
| SLC19A2      | 0.645               | 0.654 | 0.385 | 0.615 |
| BTG2         | 0.645               | 0.634 | 0.410 | 0.590 |
| CDO1         | 0.644               | 0.628 | 0.293 | 0.707 |
| NEURL3       | 0.642               | 0.610 | 0.390 | 0.610 |
| BBOX1        | 0.642               | 0.643 | 0.111 | 0.889 |
| NOX4         | 0.639               | 0.690 | 0.384 | 0.616 |
| GPLD1        | 0.638               | 0.638 | 0.377 | 0.623 |
| CCDC86       | 0.637               | 0.637 | 0.380 | 0.620 |
| AIMP2        | 0.637               | 0.644 | 0.374 | 0.626 |
| SLC22A8      | 0.636               | 0.670 | 0.375 | 0.625 |
| RGN          | 0.628               | 0.604 | 0.121 | 0.879 |
| AGT          | 0.628               | 0.651 | 0.389 | 0.611 |
| MAOB         | 0.626               | 0.639 | 0.116 | 0.884 |
| PPP1R15A     | 0.625               | 0.596 | 0.380 | 0.620 |
| C8A          | 0.624               | 0.625 | 0.266 | 0.734 |

Table S2: **Gene expression prediction performance of top-100 best predicted genes.** We report Pearson correlation, AUC, R2, and MSE. Each metric is described in the **Online methods**, section **Metrics**.

| Gene     | Pearson correlation | AUC   | R2    | MSE   |
|----------|---------------------|-------|-------|-------|
| ABCC3    | 0.623               | 0.656 | 0.336 | 0.664 |
| FADS1    | 0.623               | 0.632 | 0.292 | 0.708 |
| ADHFE1   | 0.620               | 0.611 | 0.368 | 0.632 |
| SLC25A13 | 0.620               | 0.610 | 0.298 | 0.702 |
| NREP     | 0.620               | 0.657 | 0.097 | 0.903 |
| HSPB8    | 0.618               | 0.604 | 0.360 | 0.640 |
| EPCAM    | 0.616               | 0.621 | 0.373 | 0.627 |
| LIPC     | 0.613               | 0.620 | 0.244 | 0.756 |
| NOC2L    | 0.613               | 0.630 | 0.356 | 0.644 |
| SULT1C3  | 0.608               | 0.622 | 0.271 | 0.729 |
| GULO     | 0.608               | 0.654 | 0.266 | 0.734 |
| AVPR1A   | 0.607               | 0.637 | 0.204 | 0.796 |
| STK17B   | 0.606               | 0.636 | 0.340 | 0.660 |
| C8B      | 0.606               | 0.604 | 0.344 | 0.656 |
| GADD45A  | 0.606               | 0.634 | 0.361 | 0.639 |
| F10      | 0.605               | 0.612 | 0.287 | 0.713 |
| F12      | 0.605               | 0.602 | 0.347 | 0.653 |
| OTC      | 0.602               | 0.601 | 0.088 | 0.912 |
| JUN      | 0.602               | 0.631 | 0.345 | 0.655 |
| C2CD2    | 0.602               | 0.624 | 0.359 | 0.641 |
| ICAM1    | 0.601               | 0.602 | 0.328 | 0.672 |
| HES6     | 0.601               | 0.656 | 0.275 | 0.725 |
| COQ8A    | 0.601               | 0.668 | 0.084 | 0.916 |
| PC       | 0.600               | 0.623 | 0.339 | 0.661 |
| BRIX1    | 0.600               | 0.608 | 0.350 | 0.650 |
| GSTZ1    | 0.600               | 0.610 | 0.225 | 0.775 |
| MDM2     | 0.599               | 0.621 | 0.275 | 0.725 |
| ADRA1B   | 0.599               | 0.627 | 0.314 | 0.686 |
| BAAT     | 0.598               | 0.629 | 0.012 | 0.988 |
| GOT1     | 0.597               | 0.672 | 0.337 | 0.663 |
| AADAT    | 0.597               | 0.625 | 0.325 | 0.675 |
| OBP3     | 0.597               | 0.665 | 0.331 | 0.669 |
| AADAC    | 0.596               | 0.614 | 0.147 | 0.853 |
| CYP2A2   | 0.595               | 0.603 | 0.191 | 0.809 |
| BDH1     | 0.593               | 0.623 | 0.290 | 0.710 |
| C8G      | 0.591               | 0.577 | 0.292 | 0.708 |
| IGFALS   | 0.590               | 0.654 | 0.142 | 0.858 |
| RHOB     | 0.590               | 0.627 | 0.335 | 0.665 |
| AGMO     | 0.588               | 0.620 | 0.238 | 0.762 |
| KRT8     | 0.587               | 0.629 | 0.289 | 0.711 |
| IQGAP2   | 0.586               | 0.619 | 0.281 | 0.719 |
| SLCO1A1  | 0.586               | 0.587 | 0.249 | 0.751 |
| UST5R    | 0.586               | 0.671 | 0.291 | 0.709 |
| EIF2S1   | 0.586               | 0.634 | 0.326 | 0.674 |
| ATF3     | 0.583               | 0.592 | 0.327 | 0.673 |
| CDIP1    | 0.583               | 0.616 | 0.228 | 0.772 |
| SLC17A2  | 0.583               | 0.633 | 0.258 | 0.742 |
| SCP2     | 0.582               | 0.612 | 0.260 | 0.740 |
| HDHD3    | 0.581               | 0.620 | 0.198 | 0.802 |
| ABCA8A   | 0.580               | 0.659 | 0.169 | 0.831 |

Table S2: **Continuation.**

| Lesion                  | Patch Positive | Patch Negative | WSI Positive | WSI Negative |
|-------------------------|----------------|----------------|--------------|--------------|
| Cellular infiltration   | 2,232          | 3,315          | 984          | 1,167        |
| Necrosis                | 6,568          | 26,400         | 1023         | 538          |
| Hypertrophy             | 4,525          | 5,451          | 29           | 698          |
| Fatty change            | 2,127          | 6,935          | 144          | 1,019        |
| Bile duct proliferation | 1,564          | 1,630          | 94           | 96           |
| Increased mitosis       | 3,496          | 8,978          | 404          | 1,079        |

Table S3: **Number of patch-level annotations per lesion.** Patch positive refers to the number of patches containing the lesion, and Patch negative refers to the number of patches that do not contain it (can be a normal patch or a patch containing another lesion). A description of each lesion is provided in **table S4**.

| Lesion                  | Definition                                                                                                                                              |
|-------------------------|---------------------------------------------------------------------------------------------------------------------------------------------------------|
| Cellular infiltration   | Infiltrations of inflammatory cells in the liver.<br>Includes neutrophil, mononuclear and peribiliary.                                                  |
| Necrosis                | Cell death of hepatocytes.<br>Includes single-cell necrosis (apoptosis), focal/multifocal, and zonal (centrilobular, midzonal, periportal and diffuse). |
| Hypertrophy             | Enlargement of the hepatocyte cytoplasm,<br>secondary to increase in the cytosolic protein or number of organelles.                                     |
| Fatty change            | Hepatocellular vacuolation, consistent with<br>intracytoplasmic lipid accumulation.<br>Includes macro and microvesicular.                               |
| Bile duct proliferation | Increased number of small bile ducts arising in<br>portal region. Biliary epithelium appears normal<br>or may show degenerative or atrophic changes.    |
| Increased mitosis       | Increased hepatocyte mitoses above normal background levels.                                                                                            |

Table S4: **Morphological lesion definition.** Morphological characterization of the lesions considered in this work are based on INHAND guidelines<sup>78</sup>, the International Harmonization of Nomenclature and Diagnostic Criteria, a publicly accessible resource that defines guidelines to diagnose lesions found in rodent toxicity and carcinogenicity studies.



| Lesion                  | Compound                                                                                                                                                         |
|-------------------------|------------------------------------------------------------------------------------------------------------------------------------------------------------------|
| Necrosis                | thioacetamide, ethionamide, methylene-dianiline, bromobenzene                                                                                                    |
| Cellular Infiltration   | ethionamide, thioacetamide, cyclophosphamide, methylene-dianiline                                                                                                |
| Bile duct proliferation | thioacetamide, methylene-dianiline                                                                                                                               |
| Fatty change            | ethionamide, puromycin-aminonucleoside, cycloheximide, diazepam                                                                                                  |
| Hypertrophy             | hexachlorobenzene, diazepam, thioacetamide, hydroxyzine, ethionamide, methylene-dianiline, flutamide, phenacetin, bromobenzene, griseofulvin, methyltestosterone |
| Increased mitosis       | methyltestosterone, griseofulvin, flutamide, ethionamide, puromycin aminonucleoside, danazol, hexachlorobenzene, methylene-dianiline                             |

**Table S5: List of compounds used for inferring morphomolecular signatures for each lesion.**

|                           | Necrosis | Cellular infiltration | Bile duct proliferation | Fatty change | Hypertrophy | Increased mitosis | Lesion (any) | No lesion |
|---------------------------|----------|-----------------------|-------------------------|--------------|-------------|-------------------|--------------|-----------|
| Ethionamide               | 45       | 25                    | 0                       | 19           | 2           | 10                | 59           | 59        |
| Methylene dianiline       | 40       | 42                    | 18                      | 0            | 19          | 7                 | 45           | 64        |
| Thioacetamide             | 25       | 20                    | 3                       | 0            | 29          | 0                 | 42           | 72        |
| Cycloheximide             | 19       | 0                     | 0                       | 1            | 0           | 0                 | 20           | 35        |
| Hexachlorobenzene         | 1        | 1                     | 0                       | 13           | 20          | 6                 | 28           | 66        |
| Flutamide                 | 2        | 7                     | 0                       | 0            | 16          | 1                 | 25           | 71        |
| Griseofulvin              | 2        | 0                     | 0                       | 0            | 3           | 12                | 17           | 60        |
| Bromobenzene              | 3        | 5                     | 0                       | 0            | 17          | 0                 | 18           | 72        |
| Hydroxyzine               | 0        | 0                     | 0                       | 6            | 17          | 0                 | 17           | 72        |
| Cyclophosphamide          | 0        | 14                    | 0                       | 0            | 0           | 0                 | 14           | 72        |
| Phenacetin                | 0        | 0                     | 0                       | 0            | 11          | 0                 | 11           | 72        |
| Diazepam                  | 0        | 0                     | 0                       | 1            | 10          | 0                 | 11           | 72        |
| Isoniazid                 | 1        | 2                     | 0                       | 0            | 8           | 0                 | 11           | 72        |
| Methyltestosterone        | 0        | 0                     | 0                       | 0            | 6           | 5                 | 10           | 67        |
| Danazol                   | 0        | 0                     | 0                       | 0            | 0           | 8                 | 8            | 64        |
| Tunicamycin               | 4        | 0                     | 0                       | 0            | 0           | 0                 | 4            | 36        |
| Puromycin aminonucleoside | 1        | 0                     | 0                       | 1            | 1           | 4                 | 6            | 62        |
| Mexiletine                | 1        | 0                     | 0                       | 0            | 5           | 0                 | 6            | 72        |
| Bromoethylamine           | 0        | 0                     | 0                       | 6            | 2           | 0                 | 6            | 72        |
| Methyldopa                | 3        | 0                     | 0                       | 0            | 0           | 0                 | 3            | 72        |
| Theophylline              | 2        | 0                     | 0                       | 0            | 0           | 0                 | 2            | 71        |
| Mefenamic acid            | 1        | 0                     | 0                       | 0            | 0           | 0                 | 1            | 72        |
| Cisplatin                 | 0        | 0                     | 0                       | 0            | 0           | 0                 | 0            | 70        |
| Carboplatin               | 0        | 0                     | 0                       | 0            | 0           | 0                 | 0            | 72        |
| Cyclosporine A            | 0        | 0                     | 0                       | 0            | 0           | 0                 | 0            | 72        |
| Cephalothin               | 0        | 0                     | 0                       | 0            | 0           | 0                 | 0            | 72        |
| Gentamicin                | 0        | 0                     | 0                       | 0            | 0           | 0                 | 0            | 72        |
| Acetazolamide             | 0        | 0                     | 0                       | 0            | 0           | 0                 | 0            | 72        |
| Metformin                 | 0        | 0                     | 0                       | 0            | 0           | 0                 | 0            | 72        |

**Table S6: Distribution of lesions in TG-GATEs test set stratified by compound.** Compounds are sorted by their percentage of slides with lesions.

|                           | Necrosis | Cellular infiltration | Bile duct proliferation | Hypertrophy | Fatty change | Increased mitosis | Lesion (any) | No lesion |
|---------------------------|----------|-----------------------|-------------------------|-------------|--------------|-------------------|--------------|-----------|
| Hexachlorobenzene         | 2.53e+03 | 6.10e+03              | 3.28e+02                | 5.35e+05    | 5.01e+03     | 1.82e+04          | 5.60e+05     | 8.38e+05  |
| Thioacetamide             | 2.24e+04 | 9.50e+03              | 4.85e+02                | 1.78e+05    | 1.83e+02     | 1.17e+04          | 2.14e+05     | 8.52e+05  |
| Diazepam                  | 6.35e+02 | 1.47e+03              | 7.90e+01                | 2.20e+05    | 8.88e+02     | 7.29e+03          | 2.29e+05     | 9.67e+05  |
| Ethionamide               | 2.55e+04 | 9.04e+03              | 3.03e+02                | 9.02e+04    | 3.85e+04     | 3.15e+04          | 1.79e+05     | 9.70e+05  |
| Gentamicin                | 5.38e+02 | 1.39e+03              | 2.63e+02                | 1.19e+04    | 1.50e+01     | 8.64e+04          | 1.00e+05     | 6.64e+05  |
| Cephalothin               | 4.91e+02 | 1.97e+03              | 4.20e+02                | 1.17e+04    | 2.10e+01     | 8.03e+04          | 9.47e+04     | 6.81e+05  |
| Carboplatin               | 2.13e+03 | 2.21e+03              | 1.24e+02                | 7.78e+04    | 1.90e+01     | 1.11e+04          | 9.31e+04     | 6.29e+05  |
| Acetazolamide             | 1.89e+03 | 1.38e+03              | 2.30e+02                | 8.27e+04    | 1.18e+02     | 6.34e+03          | 9.24e+04     | 6.42e+05  |
| Puromycin aminonucleoside | 4.57e+03 | 3.69e+03              | 4.71e+02                | 6.22e+04    | 4.44e+02     | 1.22e+04          | 8.28e+04     | 6.28e+05  |
| Hydroxyzine               | 4.40e+01 | 1.27e+03              | 3.10e+01                | 9.60e+04    | 3.37e+03     | 2.45e+02          | 9.76e+04     | 9.14e+05  |
| Cyclosporine A            | 4.40e+03 | 2.77e+03              | 4.83e+02                | 4.21e+04    | 2.07e+02     | 1.81e+04          | 6.74e+04     | 6.68e+05  |
| Cycloheximide             | 1.43e+04 | 2.99e+02              | 6.30e+01                | 2.24e+03    | 5.47e+03     | 1.12e+04          | 3.11e+04     | 3.19e+05  |
| Cisplatin                 | 1.33e+03 | 1.74e+03              | 3.13e+02                | 4.30e+04    | 1.13e+02     | 7.44e+03          | 5.35e+04     | 6.59e+05  |
| Isoniazid                 | 5.23e+03 | 6.84e+03              | 6.09e+02                | 5.64e+04    | 7.90e+01     | 6.86e+03          | 7.51e+04     | 1.08e+06  |
| Bromoethylamine           | 8.59e+02 | 2.07e+03              | 1.59e+02                | 3.51e+04    | 5.80e+01     | 8.72e+03          | 4.68e+04     | 6.88e+05  |
| Methylene dianiline       | 4.23e+03 | 8.30e+03              | 4.22e+03                | 4.25e+04    | 3.32e+03     | 2.92e+03          | 6.07e+04     | 9.91e+05  |
| Mexiletine                | 1.75e+03 | 5.86e+02              | 3.30e+01                | 2.32e+04    | 6.00e+00     | 2.33e+04          | 4.88e+04     | 8.08e+05  |
| Flutamide                 | 2.09e+02 | 6.47e+03              | 2.58e+03                | 2.87e+04    | 1.10e+01     | 1.57e+04          | 5.16e+04     | 1.21e+06  |
| Theophylline              | 7.78e+02 | 1.96e+02              | 1.36e+02                | 1.04e+04    | 3.10e+01     | 1.97e+04          | 3.12e+04     | 7.43e+05  |
| Tunicamycin               | 7.99e+02 | 6.60e+01              | 6.00e+00                | 2.54e+03    | 1.00e+00     | 1.24e+04          | 1.58e+04     | 3.79e+05  |
| Danazol                   | 1.39e+02 | 2.56e+02              | 5.60e+01                | 2.26e+03    | 1.90e+01     | 2.64e+04          | 2.91e+04     | 7.47e+05  |
| Bromobenzene              | 1.43e+03 | 6.70e+03              | 4.20e+01                | 1.95e+04    | 4.00e+01     | 6.83e+03          | 3.31e+04     | 9.27e+05  |
| Phenacetin                | 1.14e+02 | 1.04e+03              | 3.20e+01                | 2.64e+04    | 3.90e+01     | 6.67e+02          | 2.82e+04     | 8.00e+05  |
| Griseofulvin              | 1.16e+02 | 5.01e+03              | 1.82e+03                | 6.82e+03    | 8.00e+00     | 2.58e+04          | 3.82e+04     | 1.22e+06  |
| Methyltestosterone        | 1.60e+02 | 2.05e+03              | 1.20e+01                | 2.37e+02    | 1.50e+01     | 2.47e+04          | 2.70e+04     | 1.06e+06  |
| Mefenamic acid            | 3.31e+02 | 6.39e+03              | 2.68e+03                | 6.74e+03    | 3.00e+00     | 1.70e+04          | 3.10e+04     | 1.24e+06  |
| Cyclophosphamide          | 3.07e+02 | 3.58e+02              | 8.00e+00                | 3.52e+03    | 2.00e+00     | 7.19e+03          | 1.14e+04     | 8.15e+05  |
| Methyldopa                | 1.76e+02 | 1.81e+03              | 1.02e+02                | 1.80e+01    | 1.67e+02     | 5.56e+03          | 7.69e+03     | 9.84e+05  |
| Metformin                 | 1.81e+02 | 1.75e+03              | 4.70e+01                | 1.68e+02    | 5.10e+01     | 4.14e+03          | 6.23e+03     | 1.01e+06  |

**Table S7: Number of patches with lesions per test study.** Compounds are sorted by their percentage of slides with lesions.

|           | Necrosis | Cellular infiltration | Bile duct proliferation | Fatty change | Hypertrophy | Increased mitosis | Macro average |
|-----------|----------|-----------------------|-------------------------|--------------|-------------|-------------------|---------------|
| ABCC3     | 3.20     | 3.00                  | 3.28                    | 4.39         | 5.17        | 2.20              | 3.54          |
| GSTM3     | 2.64     | 2.71                  | 2.93                    | 3.10         | 3.12        | 1.29              | 2.63          |
| GPX2      | 3.60     | 2.77                  | 3.11                    | 2.42         | 2.75        | 1.00              | 2.61          |
| GSTA3     | 1.50     | 1.71                  | 2.15                    | 3.00         | 4.02        | 1.73              | 2.35          |
| ALDH1A1   | 0.84     | 1.43                  | 2.28                    | 2.58         | 3.64        | 1.58              | 2.06          |
| ALDH1A7   | 0.99     | 1.35                  | 2.15                    | 2.32         | 3.31        | 1.36              | 1.91          |
| ADAM8     | 2.48     | 2.22                  | 2.81                    | 1.57         | 1.37        | 0.40              | 1.81          |
| ATF3      | 3.27     | 2.64                  | 1.96                    | 1.44         | 0.98        | 0.50              | 1.80          |
| ACOT1     | 2.25     | 1.40                  | 2.27                    | 1.35         | 1.15        | 1.97              | 1.73          |
| TRIB3     | 2.84     | 2.01                  | 1.31                    | 1.50         | 1.65        | 0.65              | 1.66          |
| AKR7A3    | 1.26     | 1.30                  | 1.02                    | 2.19         | 2.56        | 1.59              | 1.66          |
| CCL2      | 3.12     | 2.54                  | 2.15                    | 1.29         | 0.70        | 0.02              | 1.64          |
| TNFRSF12A | 2.97     | 2.21                  | 1.54                    | 1.46         | 1.10        | 0.51              | 1.63          |
| AKR1B8    | 2.67     | 1.91                  | 1.61                    | 1.44         | 1.40        | 0.61              | 1.61          |
| ASNS      | 2.33     | 1.76                  | 1.87                    | 1.29         | 1.69        | 0.59              | 1.59          |
| RND1      | 3.13     | 2.28                  | 1.95                    | 1.18         | 0.87        | 0.06              | 1.58          |
| PHGDH     | 1.85     | 1.38                  | 1.49                    | 1.57         | 1.99        | 0.98              | 1.54          |
| OLR59     | -2.45    | -1.74                 | -1.68                   | -1.27        | -1.16       | -0.71             | -1.50         |
| ABCG8     | -2.06    | -1.54                 | -1.80                   | -1.47        | -1.38       | -0.86             | -1.52         |
| PKLR      | -2.42    | -1.75                 | -1.91                   | -1.34        | -1.40       | -0.78             | -1.60         |
| MTMR7     | -2.09    | -1.76                 | -2.05                   | -1.50        | -1.78       | -0.69             | -1.64         |
| AKR1C1    | -2.73    | -1.95                 | -1.97                   | -1.46        | -1.44       | -0.77             | -1.72         |
| NREP      | -3.33    | -2.02                 | -1.89                   | -1.38        | -1.47       | -0.43             | -1.75         |
| THRSP     | -2.90    | -2.18                 | -2.35                   | -1.40        | -1.28       | -0.57             | -1.78         |
| OAT       | -2.23    | -1.86                 | -2.02                   | -1.86        | -2.09       | -1.08             | -1.85         |
| LOX       | -1.49    | -1.53                 | -2.13                   | -2.08        | -3.11       | -0.84             | -1.86         |
| SLC22A8   | -2.43    | -2.07                 | -2.52                   | -1.71        | -1.65       | -0.82             | -1.87         |
| BMF       | -3.01    | -2.17                 | -2.21                   | -1.66        | -1.56       | -0.68             | -1.88         |
| INMT      | -3.13    | -2.63                 | -3.16                   | -1.77        | -1.57       | -1.22             | -2.25         |
| NOX4      | -3.21    | -2.62                 | -2.96                   | -2.02        | -2.00       | -0.98             | -2.30         |
| CAR3      | -3.30    | -2.50                 | -3.16                   | -2.22        | -2.10       | -0.95             | -2.37         |
| OBP3      | -3.02    | -2.70                 | -3.66                   | -2.21        | -2.15       | -1.26             | -2.50         |
| STAC3     | -5.14    | -4.07                 | -4.97                   | -3.91        | -4.16       | -2.04             | -4.05         |

**Table S8: Genes indicative of general toxic exposure.** Listed genes with the highest mean absolute predicted gene expression across patches with lesions. Analysis was conducted using five studies that report a large range of lesions: thioacetamide, methylene dianiline, ethionamide, bromobenzene, hexachlorobenzene.

|           | Increased mitosis | Mean expression | Correlation prediction |
|-----------|-------------------|-----------------|------------------------|
| CCNA2     | 2.52              | 0.33            | 0.40                   |
| KNSTRN    | 2.50              | -0.01           | 0.42                   |
| CDKN3     | 2.41              | 0.01            | 0.27                   |
| ECT2      | 2.32              | 0.31            | 0.51                   |
| CENPW     | 2.10              | 0.10            | 0.46                   |
| CDK1      | 2.09              | 0.21            | 0.44                   |
| CCNB1     | 2.05              | 0.20            | 0.45                   |
| CDCA3     | 2.05              | 0.17            | 0.51                   |
| SKA1      | 2.04              | 0.31            | 0.60                   |
| MKI67     | 2.01              | 0.44            | 0.58                   |
| TOP2A     | 1.90              | 0.17            | 0.46                   |
| KIF18B    | 1.84              | 0.37            | 0.40                   |
| AURKB     | 1.81              | 0.39            | 0.59                   |
| UBE2C     | 1.80              | 0.25            | 0.47                   |
| SPC24     | 1.77              | 0.12            | 0.70                   |
| BUB1      | 1.73              | 0.27            | 0.57                   |
| NUSAP1    | 1.73              | 0.13            | 0.52                   |
| PTTG1     | 1.72              | 0.17            | 0.41                   |
| IQGAP3    | 1.67              | 0.29            | 0.53                   |
| CCNB2     | 1.67              | 0.15            | 0.39                   |
| AURKA     | 1.66              | 0.27            | 0.57                   |
| NCAPH     | 1.66              | 0.34            | 0.53                   |
| HMMR      | 1.52              | 0.26            | 0.53                   |
| ARHGAP11A | 1.51              | 0.53            | 0.70                   |
| ASPM      | 1.49              | 0.22            | 0.56                   |
| SKA3      | 1.48              | 0.27            | 0.68                   |
| HJURP     | 1.45              | 0.46            | 0.61                   |
| ANLN      | 1.30              | 0.29            | 0.49                   |
| CENPF     | 1.30              | 0.21            | 0.49                   |
| FAM83D    | 1.28              | -0.06           | 0.33                   |
| BIRC5     | 1.17              | 0.17            | 0.37                   |
| CDC20     | 1.07              | -0.09           | 0.61                   |
| EXO1      | 0.99              | 0.21            | 0.35                   |
| E2F1      | 0.96              | 0.37            | 0.57                   |
| CKS2      | 0.93              | 0.24            | 0.53                   |
| CDKN2C    | 0.91              | 0.00            | 0.56                   |
| HAUS4     | 0.88              | 0.10            | 0.49                   |
| H2AX      | 0.88              | 0.32            | 0.52                   |
| RBL1      | 0.87              | 0.36            | 0.70                   |
| TUBB5     | 0.84              | 0.41            | 0.75                   |
| DCTPP1    | 0.83              | 0.32            | 0.41                   |
| SMC4      | 0.75              | 0.14            | 0.33                   |
| TK1       | 0.74              | 0.16            | 0.40                   |
| MBOAT1    | 0.72              | 0.35            | 0.67                   |
| H2AZ1     | 0.70              | 0.18            | 0.47                   |
| MCM5      | 0.69              | 0.28            | 0.62                   |
| CCNF      | 0.68              | -0.01           | 0.51                   |
| NETO2     | 0.67              | -0.09           | 0.50                   |
| CCNE1     | 0.65              | 0.29            | 0.70                   |
| PRIM1     | 0.58              | 0.15            | 0.65                   |
| DNAJC9    | 0.54              | 0.13            | 0.47                   |

**Table S9: List of 51 genes identified as being linked to increased mitosis.** Analysis was conducted using eight compounds that reported increased mitosis. Patch-level average gene expression for patches containing mitosis compared to those identified with any of the five other lesions.

|              | necrosis | mean expression lesion | correlation prediction |
|--------------|----------|------------------------|------------------------|
| ATF3         | 3.37     | 1.40                   | 0.65                   |
| TRIB3        | 3.23     | 1.47                   | 0.62                   |
| MAFF         | 3.10     | 0.95                   | 0.66                   |
| TNFRSF12A    | 3.09     | 1.30                   | 0.79                   |
| ZFAND2A      | 2.87     | 0.97                   | 0.75                   |
| IFRD1        | 2.11     | 0.98                   | 0.60                   |
| MDM2         | 2.01     | 0.99                   | 0.71                   |
| FGF21        | 2.01     | 0.93                   | 0.46                   |
| MYC          | 1.88     | 0.77                   | 0.77                   |
| CDKN1A       | 1.87     | 0.92                   | 0.35                   |
| GADD45A      | 1.87     | 0.80                   | 0.62                   |
| HSPB1        | 1.86     | 0.88                   | 0.61                   |
| SRXN1        | 1.84     | 0.84                   | 0.63                   |
| HSPA1A       | 1.78     | 0.52                   | 0.41                   |
| SLC3A2       | 1.71     | 0.80                   | 0.72                   |
| DDIT3        | 1.70     | 0.75                   | 0.49                   |
| HMOX1        | 1.65     | 0.64                   | 0.75                   |
| AEN          | 1.62     | 0.60                   | 0.71                   |
| TMBIM1       | 1.62     | 0.61                   | 0.73                   |
| LOC100911177 | 1.56     | 0.64                   | 0.74                   |
| LOC100912041 | 1.53     | 0.56                   | 0.63                   |
| FBXO30       | 1.37     | 0.57                   | 0.68                   |
| PPP1R15A     | 1.36     | 0.46                   | 0.74                   |
| CCDC86       | 1.28     | 0.46                   | 0.56                   |
| JUN          | 1.25     | 0.62                   | 0.65                   |
| HSPB8        | 1.24     | 0.45                   | 0.75                   |
| FOSL1        | 1.21     | 0.02                   | 0.59                   |
| AIMP2        | 1.20     | 0.53                   | 0.80                   |
| SLC7A11      | 1.15     | 0.43                   | 0.38                   |
| G6PD         | 1.13     | 0.56                   | 0.41                   |
| TXNRD1       | 1.13     | 0.51                   | 0.57                   |
| RIOK3        | 1.07     | 0.36                   | 0.50                   |
| CXCL2        | 1.01     | 0.05                   | 0.47                   |
| ALDH4A1      | -1.02    | -0.37                  | 0.80                   |
| ACACA        | -1.03    | -0.32                  | 0.66                   |
| AQP9         | -1.09    | -0.44                  | 0.47                   |
| RARB         | -1.10    | -0.42                  | 0.67                   |
| CAR14        | -1.11    | -0.38                  | 0.78                   |
| FDFT1        | -1.12    | -0.18                  | 0.40                   |
| BHMT2        | -1.12    | -0.34                  | 0.80                   |
| IGFBP3       | -1.12    | -0.49                  | 0.72                   |
| CADPS2       | -1.13    | -0.47                  | 0.66                   |
| EBP          | -1.13    | -0.39                  | 0.74                   |
| HGD          | -1.16    | -0.49                  | 0.72                   |
| SUOX         | -1.18    | -0.48                  | 0.83                   |
| GK           | -1.21    | -0.57                  | 0.74                   |
| ARHGEF19     | -1.22    | -0.47                  | 0.50                   |
| ALBFM1       | -1.23    | -0.57                  | 0.73                   |
| VEPH1        | -1.23    | -0.27                  | 0.63                   |
| ACKR4        | -1.27    | -0.38                  | 0.83                   |
| ADAMTS7      | -1.30    | -0.63                  | 0.65                   |
| CTH          | -1.31    | -0.33                  | 0.54                   |
| HMGCS1       | -1.36    | -0.38                  | 0.32                   |
| PRLR         | -1.41    | -0.29                  | 0.33                   |
| HDHD3        | -1.43    | -0.58                  | 0.38                   |
| HES6         | -1.53    | -0.55                  | 0.64                   |
| ABCA8A       | -1.55    | -0.72                  | 0.86                   |
| ACSS2        | -1.75    | -0.45                  | 0.66                   |
| COQ8A        | -1.86    | -0.74                  | 0.82                   |
| CXCL12       | -2.04    | -0.91                  | 0.79                   |
| FADS1        | -2.07    | -0.64                  | 0.63                   |
| XPNPEP2      | -2.15    | -0.93                  | 0.72                   |
| ACACB        | -2.18    | -0.65                  | 0.58                   |
| CYP7A1       | -2.36    | -0.67                  | 0.66                   |
| AVPR1A       | -2.52    | -0.93                  | 0.83                   |
| NREP         | -3.30    | -1.45                  | 0.80                   |

Table S10: Caption next page.

**Table S10: List of 66 genes identified as being linked to necrosis.** Analysis was conducted using five compounds that reported necrosis. Patch-level average gene expression for patches containing necrosis compared to those identified with any of the five other lesions.

|         | cellular infiltration | mean expression lesion | correlation prediction |
|---------|-----------------------|------------------------|------------------------|
| CXCL1   | 2.38                  | 0.92                   | 0.41                   |
| BCL2A1  | 1.67                  | 0.71                   | 0.48                   |
| S100A4  | 1.66                  | 0.78                   | 0.41                   |
| CXCL10  | 1.63                  | 0.72                   | 0.31                   |
| S100A8  | 1.49                  | 0.56                   | 0.50                   |
| CHI3L1  | 1.32                  | 0.54                   | 0.58                   |
| S100A9  | 1.23                  | 0.38                   | 0.36                   |
| IL1B    | 1.17                  | 0.41                   | 0.51                   |
| CAPG    | 1.11                  | 0.54                   | 0.55                   |
| TGFB1   | 1.06                  | 0.35                   | 0.59                   |
| PTPRC   | 0.91                  | 0.35                   | 0.37                   |
| ACKR3   | 0.88                  | 0.35                   | 0.46                   |
| FILIP1L | 0.83                  | 0.35                   | 0.47                   |
| C5AR1   | 0.77                  | 0.37                   | 0.42                   |
| CD83    | 0.76                  | 0.29                   | 0.40                   |
| EVI2A   | 0.74                  | 0.26                   | 0.48                   |
| LCP1    | 0.73                  | 0.29                   | 0.55                   |
| ICAM1   | 0.72                  | 0.33                   | 0.56                   |
| CYBB    | 0.70                  | 0.24                   | 0.43                   |
| IL7     | 0.69                  | 0.14                   | 0.44                   |
| CASP1   | 0.67                  | 0.28                   | 0.49                   |
| PSMB9   | 0.64                  | 0.30                   | 0.41                   |
| GLIPR1  | 0.62                  | 0.29                   | 0.55                   |
| AP1S2   | 0.57                  | 0.23                   | 0.40                   |
| PLVAP   | 0.54                  | -0.04                  | 0.31                   |
| SRGN    | 0.53                  | 0.22                   | 0.39                   |
| IFITM2  | 0.52                  | 0.26                   | 0.68                   |

**Table S11: List of 27 genes identified as being linked to cellular infiltration.** Analysis was conducted using five compounds that reported cellular infiltration. Patch-level average gene expression for patches containing cellular infiltration compared to those identified with any of the five other lesions.

|          | bile duct proliferation | mean expression lesion | correlation prediction |
|----------|-------------------------|------------------------|------------------------|
| SERPINA7 | 3.14                    | 1.08                   | 0.58                   |
| BEX4     | 2.20                    | 1.01                   | 0.78                   |
| CDH13    | 2.12                    | 0.75                   | 0.34                   |
| LGALS2   | 2.01                    | 0.69                   | 0.52                   |
| CLDN7    | 1.60                    | 0.66                   | 0.68                   |
| ANXA5    | 1.57                    | 0.65                   | 0.75                   |
| STING1   | 1.52                    | 0.60                   | 0.60                   |
| RGS5     | 1.50                    | 0.58                   | 0.53                   |
| UAPIL1   | 1.47                    | 0.71                   | 0.63                   |
| CD24     | 1.45                    | 0.49                   | 0.70                   |
| TAGLN    | 1.34                    | 0.38                   | 0.78                   |
| AJUBA    | 1.21                    | 0.58                   | 0.63                   |
| IGF2R    | 1.17                    | 0.53                   | 0.76                   |
| ASAH1    | 1.17                    | 0.47                   | 0.67                   |
| LBH      | 1.16                    | 0.40                   | 0.77                   |
| FHL2     | 1.05                    | 0.27                   | 0.77                   |
| UNC5CL   | 1.01                    | 0.49                   | 0.38                   |
| EDEM1    | -1.06                   | -0.52                  | 0.84                   |
| AGXT     | -1.37                   | -0.69                  | 0.70                   |
| DPT      | -1.38                   | -0.60                  | 0.89                   |
| C8G      | -1.69                   | -0.80                  | 0.85                   |
| ASPG     | -1.79                   | -0.78                  | 0.65                   |
| GPT      | -2.25                   | -1.04                  | 0.61                   |
| SERPINA4 | -2.32                   | -1.18                  | 0.88                   |

**Table S12: List of 24 genes identified as being linked to bile duct proliferation.** Analysis was conducted using two compounds that reported bile duct proliferation. Patch-level average gene expression for patches containing bile duct proliferation compared to those identified with any of the five other lesions.

|        | fatty change | mean expression lesion | correlation prediction |
|--------|--------------|------------------------|------------------------|
| ACOT1  | 1.93         | 0.47                   | 0.59                   |
| GSTP1  | 1.48         | 0.58                   | 0.40                   |
| CIDEA  | 1.04         | 0.38                   | 0.30                   |
| ACOT2  | 0.83         | 0.13                   | 0.31                   |
| TMED3  | 0.75         | 0.35                   | 0.53                   |
| CYP1A1 | 0.75         | -0.06                  | 0.63                   |
| HID1   | 0.71         | 0.18                   | 0.54                   |
| FKBP11 | 0.65         | 0.25                   | 0.72                   |
| IRAK1  | 0.63         | 0.26                   | 0.46                   |
| MANBA  | 0.56         | 0.17                   | 0.65                   |
| ACP3   | -0.52        | -0.21                  | 0.35                   |
| EPST11 | -0.58        | -0.15                  | 0.42                   |
| C5     | -0.61        | -0.22                  | 0.30                   |
| SLC6A6 | -1.01        | -0.48                  | 0.48                   |

**Table S13: List of 14 genes identified as being linked to fatty change.** Analysis was conducted using four compounds that reported fatty change. Patch-level average gene expression for patches containing fatty change compared to those identified with any of the five other lesions.



|            | hypertrophy | mean expression lesion | correlation prediction |
|------------|-------------|------------------------|------------------------|
| GSTA3      | 3.90        | 1.52                   | 0.72                   |
| ALDH1A1    | 3.56        | 1.43                   | 0.76                   |
| CYP1A1     | 3.23        | 0.25                   | 0.43                   |
| ALDH1A7    | 3.19        | 1.31                   | 0.43                   |
| ACSM2      | 1.44        | 0.33                   | 0.35                   |
| RGD1559459 | 1.33        | 0.44                   | 0.77                   |
| ADGRG2     | 1.32        | 0.45                   | 0.59                   |
| VNN1       | 1.24        | 0.28                   | 0.51                   |
| ME1        | 1.18        | -0.26                  | 0.43                   |
| EPHX1      | 1.04        | 0.31                   | 0.46                   |
| POR        | 0.91        | 0.11                   | 0.54                   |
| GCLM       | 0.71        | 0.00                   | 0.53                   |
| GCLC       | 0.62        | 0.05                   | 0.46                   |
| GSTA4      | 0.60        | -0.06                  | 0.72                   |
| TFRC       | 0.58        | 0.04                   | 0.46                   |
| ADH4       | 0.51        | -0.29                  | 0.45                   |
| MCRIP2     | 0.51        | 0.08                   | 0.68                   |
| GSTM2      | 0.50        | -0.16                  | 0.64                   |
| NAPSA      | -0.54       | 0.45                   | 0.31                   |
| PLVAP      | -0.85       | 0.23                   | 0.37                   |
| SLC34A2    | -1.08       | -0.25                  | 0.37                   |
| SLC6A6     | -1.28       | -0.38                  | 0.44                   |
| LOX        | -2.97       | -1.32                  | 0.56                   |

Table S14: **List of 23 genes identified as being linked to hypertrophy.** Analysis was conducted using eleven compounds that reported hypertrophy. Patch-level average gene expression for patches containing hypertrophy compared to those identified with any of the 5 other lesions.

| Hyper-parameter                       | Value        |
|---------------------------------------|--------------|
| Layers                                | 24           |
| Heads                                 | 16           |
| Patch size                            | 16           |
| FFN layer                             | MLP          |
| Head activation                       | GELU         |
| Embedding dimension                   | 1024         |
| Stochastic dropout rate               | 0.1          |
| Global crop scale                     | 0.48, 1.0    |
| Global crop number & size             | 2, 224       |
| Local crop scale                      | 0.16, 0.48   |
| Local crop number & size              | 8, 96        |
| Max masking ratio                     | 0.5          |
| Min masking ratio                     | 0.1          |
| Gradient clipping max norm            | 3.0          |
| Normalize last layer                  | ✓            |
| Shared head                           | ✗            |
| AdamW $\beta$                         | (0.9, 0.999) |
| Batch size                            | 3072         |
| Freeze last layer iterations          | 1250         |
| Warmup iterations                     | 12500        |
| Warmup teacher temperature iterations | 37500        |
| High-resolution finetuning iterations | 12500        |
| Max Iterations                        | 125000       |
| Learning rate schedule                | Cosine       |
| Learning rate (start)                 | 0            |
| Learning rate (post warmup)           | 2e-3         |
| Learning rate (final)                 | 1e-6         |
| Teacher temperature (start)           | 0.04         |
| Teacher temperature (final)           | 0.4          |
| Teacher momentum (start)              | 0.992        |
| Teacher momentum (final)              | 1.000        |
| Weight decay (start)                  | 0.04         |
| Weight decay (end)                    | 0.4          |
| Automatic mixed precision             | fp16         |

Table S15: **iBOT hyperparameters used SSL pretraining.**  $4 \times 80\text{GB}$  NVIDIA A100 GPUs were used for training. Batch size refers to the total batch size across GPUs.

| Hyperparameter         | Value        |
|------------------------|--------------|
| Batch size             | 1            |
| Weight decay           | 1e-5         |
| AdamW $\beta$          | (0.9, 0.999) |
| Peak learning rate     | 1e-4         |
| Learning rate schedule | Cosine       |
| Epochs                 | 20           |

Table S16: **Hyperparameters used in GEESE classification.** A single 24GB NVIDIA GeForce RTX 3090 GPU was used for each MIL model using weakly-supervised learning and slide-level labels.
